# Supplementary material for: Risk factors for new-onset atrial fibrillation on the general adult ICU: protocol for a systematic review
Source: PubMed Central journal article supplement — BMJ Open. 2018 Sep 4;8(9):e024640. doi: 10.1136/bmjopen-2018-024640 (PMC6129085; doi:10.1136/bmjopen-2018-024640), 2018-09-04
Supplement: bmjopen-2018-024640.draft_revisions.pdf [file bmjopen-2018-024640.draft_revisions.pdf]

# BMJ Open

BMJ Open is committed to open peer review. As part of this commitment we make the peer review history of every article we publish publicly available.

When an article is published we post the peer reviewers' comments and the authors' responses online. We also post the versions of the paper that were used during peer review. These are the versions that the peer review comments apply to.

The versions of the paper that follow are the versions that were submitted during the peer review process. They are not the versions of record or the final published versions. They should not be cited or distributed as the published version of this manuscript.

BMJ Open is an open access journal and the full, final, typeset and author-corrected version of record of the manuscript is available on our site with no access controls, subscription charges or pay-per-view fees (<http://bmjopen.bmj.com>).

If you have any questions on BMJ Open's open peer review process please email [info.bmjopen@bmj.com](mailto:info.bmjopen@bmj.com)

# BMJ Open

## Risk factors for new-onset atrial fibrillation on the general adult ICU: Protocol for a systematic review

|                               |                                                                                                                                                                                                                                                                                                                                                                                                                                                                                                                                                                                                                                                                   |
|-------------------------------|-------------------------------------------------------------------------------------------------------------------------------------------------------------------------------------------------------------------------------------------------------------------------------------------------------------------------------------------------------------------------------------------------------------------------------------------------------------------------------------------------------------------------------------------------------------------------------------------------------------------------------------------------------------------|
| Journal:                      | <i>BMJ Open</i>                                                                                                                                                                                                                                                                                                                                                                                                                                                                                                                                                                                                                                                   |
| Manuscript ID                 | bmjopen-2018-024640                                                                                                                                                                                                                                                                                                                                                                                                                                                                                                                                                                                                                                               |
| Article Type:                 | Protocol                                                                                                                                                                                                                                                                                                                                                                                                                                                                                                                                                                                                                                                          |
| Date Submitted by the Author: | 10-Jun-2018                                                                                                                                                                                                                                                                                                                                                                                                                                                                                                                                                                                                                                                       |
| Complete List of Authors:     | Bedford, Jonathan; University of Oxford Nuffield Department of Clinical Neurosciences, Kadoorie Centre for Critical Care Research and Education<br>Harford, Mirae; University of Oxford Nuffield Department of Clinical Neurosciences, Kadoorie Centre for Critical Care Research and Education<br>Petricic, Tatjana; University of Oxford Health Care Libraries<br>Young, Duncan; University of Oxford Nuffield Department of Clinical Neurosciences, Kadoorie Centre for Critical Care Research and Education<br>Watkinson, Peter; University of Oxford Nuffield Department of Clinical Neurosciences, Kadoorie Centre for Critical Care Research and Education |
| Keywords:                     | INTENSIVE & CRITICAL CARE, Adult cardiology < CARDIOLOGY, EPIDEMIOLOGY                                                                                                                                                                                                                                                                                                                                                                                                                                                                                                                                                                                            |
|                               |                                                                                                                                                                                                                                                                                                                                                                                                                                                                                                                                                                                                                                                                   |

SCHOLARONE™  
Manuscripts

# Risk factors for new-onset atrial fibrillation on the general adult ICU: Protocol for a systematic review

Jonathan Bedford<sup>1</sup>, Mirae Harford, Tatjana Petrinic<sup>2</sup>, Duncan Young<sup>1</sup> and Peter Watkinson<sup>1</sup>

Correspondence: Jonathan.Bedford@ndcn.ox.ac.uk

<sup>1</sup>Kadoorie Centre for Critical Care Research and Education, John Radcliffe Hospital, Level 3, Headley Way, Oxford OX3 9DU, UK.

<sup>2</sup>University of Oxford, Bodleian Health Care Libraries, Academic Centre, John Radcliffe Hospital, Level 3, Headley Way, Oxford OX3 9DU, UK.

Word count: 1658

Keywords: Atrial fibrillation, risk factors, critical illness, intensive care units, intensive care

For peer review only

## ABSTRACT

### Introduction

Atrial fibrillation (AF) is a common arrhythmia in the critical care environment. New-onset AF is associated with increased mortality and intensive care unit (ICU) length of stay. Observational studies have identified several epidemiologic and disease severity-related factors associated with developing new-onset AF on the ICU. However, there is limited data on the modifiable risk-factors in the general adult ICU population.

We describe a protocol for a systematic review of modifiable and non-modifiable risk factors for new-onset AF in the general adult ICU population.

### Methods and analysis

MEDLINE, EMBASE and the Cochrane Library, including Cochrane Database of Systematic Reviews and the Cochrane Central Register of Controlled Trials (CENTRAL) will be searched for studies that assess the association of patient variables, investigation results, interventions and diagnoses associated with subsequent new-onset atrial fibrillation on the ICU.

Only studies involving adult patients admitted to non-service-specific ICUs will be included. We will extract data relating to the statistical association between reversible and non-reversible factors and AF, the quality of the studies and the generalisability of the results. This systematic review will be reported according to the Preferred Reporting Items for Systematic reviews and Meta-Analyses (PRISMA).

### Ethics and dissemination

This proposed systematic review will be based on published data, and therefore ethical approval is not required. The results of this review will aid the development of future risk prediction tools along with informing current bedside practice in the prevention of new-onset atrial fibrillation on the ICU. The findings of this study will be disseminated through publication in a peer reviewed journal and will be presented at conferences.

### Trial registration number

CRD42017074221.

## ARTICLE SUMMARY

### Strengths and limitations of this study

- New-onset atrial fibrillation in intensive care is a common and important condition
- This protocol will ensure a targeted and comprehensive analysis of this poorly-understood phenomenon
- This protocol addresses issues with previous reviews in this area
- This protocol will guide an unbiased systematic review based on agreed best practice principles
- The results of this review will inform current practice and aid the development of risk prediction tools

## INTRODUCTION

Atrial fibrillation (AF) is the most common arrhythmia in critically ill patients<sup>1,2</sup>. AF is particularly common after cardiac surgery, with a prevalence ranging from 10-65% depending on the nature of the surgery<sup>3</sup>. Data regarding new-onset atrial fibrillation in non-service-specific intensive care units (ICUs) is more limited. Observational data suggest new-onset AF occurs in 4.5-15% of patients in this setting<sup>4-9</sup> and up to 46% of patients with septic shock<sup>10</sup>.

New onset atrial fibrillation in critically ill patients is associated with increased mortality and length of stay<sup>1,8,11</sup>. It is unclear whether AF itself is an independent contributor to poor outcome, or rather a marker of disease severity<sup>7</sup>. However, given the detrimental effects of AF on cardiac output and filling pressures, it is feasible that the arrhythmia itself contributes to increased mortality<sup>12</sup>. Furthermore, atrial fibrillation in critically ill patients is associated with thromboembolic complications and these may contribute to poorer outcomes<sup>13</sup>.

Risk factors for developing AF on the ICU include patient factors such as increasing age or presence of comorbidities, and ICU interventions including renal replacement therapy, vasopressor use and the use of pulmonary artery catheters<sup>7,9,13</sup>. The risk of developing new-onset AF also increases with increasing disease severity e.g. APACHE score<sup>7</sup>. Whilst a systematic review of AF risk factors in sepsis has been undertaken<sup>14</sup>, this included studies that did not exclude patients with potential prior or paroxysmal AF<sup>15-17</sup>. A systematic review has also been undertaken in the general adult ICU population<sup>18</sup>. However, this again did not focus on true new-onset AF, and did not provide an evidence synthesis.

There is a paucity of data around reversible / modifiable antecedents in this context. Current practice of preventing atrial fibrillation in critically ill patients is variable and not based on robust evidence. Given the potential morbidity and mortality associated with new-onset AF on the ICU, a better understanding of modifiable and non-modifiable risk factors may improve patient care and outcomes.

## OBJECTIVE

We will conduct a systematic review to identify studies of factors that are associated with an increased risk of new-onset atrial fibrillation in adult patients on non-service specific intensive care units.

## METHODS

This protocol will adhere to the requirements of Preferred Reporting Items for Systematic Reviews and Meta-Analyses Protocol (PRISMA-P)<sup>19</sup> (Appendix 1). The protocol is registered, PROSPERO: CRD42017074221.

## Patient and public involvement

We have involved the Oxford ICU patient forum. This is a cohort participants previously managed on Oxford ICUs and their relatives. They are recruited from the ICU follow-up clinic. Within this group are members who experienced atrial fibrillation during their stay. They stressed the importance of producing evidence to guide the prevention and management strategies for new-onset AF on the ICU. They felt the phenomenon was poorly understood, including investigations and management after discharge.

## Search strategy

Papers will be identified by searching Medical Literature Analysis and Retrieval System Online (MEDLINE), Excerpta Medica database (EMBASE), the Cochrane Database of Systematic Reviews and the Cochrane Central Register of Controlled Trials (CENTRAL). We will include additional papers from other sources including the references of reviews articles or studies identified during screening. A full description of the search strategy is outlined in Appendix 2.

## Study selection

Two reviewers will independently undertake initial relevance screening of titles and abstracts. The researchers will not be blinded to the journal titles or to the study authors or institutions. If there is disagreement or uncertainty regarding eligibility, the article will be included in the next stage of screening for further analysis for inclusion/exclusion. The full text will be retrieved for all articles not excluded by the initial screening. These papers will be assessed against the inclusion and exclusion criteria. Disagreements about eligibility will be resolved by discussion between the screening researchers or a third party.

## Data management

We will use Covidence (Veritas Health Innovation Ltd., Melbourne, Australia) software to identify duplicate records and for relevance screening. We will use a reference manager program (EndNoteX8, Clarivate Analytics, Philadelphia, USA) to store identified citations and their electronic text.

## Inclusion criteria

### Types of studies

Quantitative studies published in peer reviewed journals assessing adults will be eligible for inclusion in this review. Studies are likely to be prospective or retrospective cohort or case-control studies.

### Study characteristics

Eligible studies must include both a cohort of patients who developed new-onset atrial-fibrillation and a cohort who did not. They must include at least one risk factor that was investigated. The studies must be based in non-service-specific ICUs. These will include general medical, surgical or mixed ICUs. Studies of cohorts defined by a single disease or narrow group of diseases (e.g. myocardial infarction or sepsis) will be included. Identified studies published from January 1970 until the day of search completion will be included.

### Phenomenon of interest

Studies must describe a statistical relationship between a patient-derived variable (e.g. age, blood pressure or serum potassium level) and the development of new-onset atrial fibrillation. 'Diagnosis' may be included as a variable. We will include studies that group atrial fibrillation with atrial flutter, providing no other arrhythmia types were included. We will include studies investigating new-onset supraventricular arrhythmias, providing atrial fibrillation constituted at least 70% of arrhythmia episodes.

### Population

Studies that sample adult patients admitted to the ICU types specified above will be considered for inclusion.

For the purpose of this review, an adult is defined as  $\geq 16$  years of age. There will be no other restrictions.

## Exclusion criteria

### Types of studies

Qualitative studies, case studies, editorials, letters, practice guidelines and abstract-only reports will be excluded.

### Study characteristics

Studies of cohorts defined by a single procedure or narrow group of procedures (e.g. appendicectomy or hepatobiliary surgery) will be excluded. Studies based on service-specific (e.g. cardiac, cardiothoracic surgical or neurosurgical) ICUs will also be excluded. Studies published in a language other than English will be excluded.

### Phenomenon of interest

Studies will be excluded if no risk factors are analysed. Studies that do not specify arrhythmia type will also be excluded.

### Population

Studies of participants under 16 years old will be excluded.

## Data extraction

Data will be extracted from identified full text articles and supplementary material. One researcher (JB) will be responsible for data extraction. All uncertainties regarding data extraction will be resolved by discussion amongst the study team. Extracted data will include study design, study setting, incidence of AF, AF detection method(s) and risk factor estimates including odds ratios, confidence intervals and p-values for statistical significance. We will populate pre-specified data extraction tables. Where insufficient data is presented we will request additional data from the authors.

## Risk of bias assessment

We will assess risk of bias using an adapted Newcastle-Ottawa Scale (NOS)<sup>20</sup>. The NOS is a scoring system designed to assess the quality of non-randomised studies in meta-analyses. Scores are attributed to each paper after assessing domains including the selection of study groups, the comparability of the groups and the ascertainment of the outcome of interest. We have incorporated adaptations from a previous systematic review of risk factors<sup>21</sup>. We have further modified this with the intention of best evaluating our phenomenon of interest. The scoring system used in this systematic review will allocate scores from zero to nine and is outlined in Appendix 3.

## Data synthesis and analysis

We will extract summary comparison data as odds ratios (95% confidence intervals) where possible. Where sufficient original data is presented we will calculate odds ratios. We will then conduct a semi-quantitative synthesis of results from included studies using a method previously described by Zaal, et al.<sup>22</sup> and adapted by Dettmer, et al.<sup>23</sup>. Identified variables with associated p-values of  $\leq 0.05$  or 95% confidence intervals that do not cross 1 will be allocated a relative strength. This will be based on a composite of the number of articles in which an association is identified, and the methodological quality of those articles as defined by our adapted NOS. Criteria for strength of evidence is outlined in table 1.

*Table 1 - Level of evidence for risk factors for new-onset atrial fibrillation*

| Level of evidence | Criteria                                                                     |
|-------------------|------------------------------------------------------------------------------|
| Strong evidence   | Consistent findings in $\geq 2$ high quality studies (adapted NOS score 8-9) |

|                   |                                                                                                                                                                     |
|-------------------|---------------------------------------------------------------------------------------------------------------------------------------------------------------------|
|                   | AND no conflicting studies                                                                                                                                          |
| Moderate evidence | Consistent findings in 1 high quality study<br>AND $\geq 1$ acceptable quality study (adapted NOS score 6-7)<br>AND no conflicting studies                          |
| Weak evidence     | Consistent findings in $\geq 3$ low quality studies (adapted NOS score $\leq 5$ )<br>OR $\geq 2$ acceptable quality studies<br>OR 1 high quality study in isolation |

## DISCUSSION

Several epidemiological and disease severity-related factors have been associated with new-onset atrial fibrillation on the ICU in observational studies. These have not yet been investigated in the general adult ICU population in a systematic review with an evidence synthesis. Data is also limited regarding modifiable or reversible risk factors; available evidence is scarce regarding specific patient vital signs, laboratory results or ICU procedures that may increase the risk of AF. Current clinical practice is therefore variable and not evidence-based.

The findings from this review will contribute towards an improved understanding of the modifiable and non-modifiable antecedents of new-onset AF on the ICU. It may lead to a clinically useful risk-prediction model and promote an evidence-based approach towards AF prevention at the bedside. Given the high prevalence and significant associated morbidity and mortality of new-onset AF on the ICU, optimal prevention strategies may result in improved patient outcomes.

## DECLARATIONS

### Abbreviations

AF: atrial fibrillation; CENTRAL: The Cochrane Database of Systematic Reviews and the Cochrane Central Register of Controlled Trials; EMBASE: Excerpta Medica database; ICU: Intensive care unit; MEDLINE: Medical Literature Analysis and Retrieval System Online; PRISMA-P: Preferred Reporting Items for Systematic Reviews and Meta-analyses Protocol.

### Funding

This work has been funded by the National Institute for Health Research (NIHR) and by the NIHR Biomedical Research Centre (Oxford). These funders played no role in developing the review. All views expressed are those of the authors and not necessarily those of the Department of Health or NIHR.

### Availability of data and materials

Not applicable.

### Author contributions

JB, DY and PW have substantially contributed to the design of the systematic review. TP has developed the search strategy. JB, DY and PW wrote this manuscript. MH will contribute toward study selection. All authors read and approved the final manuscript. The funders have not been involved in the study design or reporting. PW is guarantor of this review. The authors would like to thank the patients involved in the development of this protocol.

### Competing interests

The authors declare that they have no competing interests.



## Consent for publication

Not applicable.

## Ethics approval and consent to participate

Not applicable.

## REFERENCES

1. Annane D, Sebille V, Duboc D, et al. Incidence and prognosis of sustained arrhythmias in critically ill patients. *American journal of respiratory and critical care medicine* 2008;178(1):20-5.
2. Artucio H, Pereira M. Cardiac arrhythmias in critically ill patients: epidemiologic study. *Crit Care Med* 1990;18(12):1383-8.
3. Maisel WH, Rawn JD, Stevenson WG. Atrial fibrillation after cardiac surgery. *Annals of internal medicine* 2001;135(12):1061-73.
4. Kanji S, Williamson DR, Yaghchi BM, et al. Epidemiology and management of atrial fibrillation in medical and noncardiac surgical adult intensive care unit patients. *Journal of critical care* 2012;27(3):326 e1-8.
5. Bender JS. Supraventricular tachyarrhythmias in the surgical intensive care unit: an under-recognized event. *The American surgeon* 1996;62(1):73-5.
6. Knotzer H, Mayr A, Ulmer H, et al. Tachyarrhythmias in a surgical intensive care unit: a case-controlled epidemiologic study. *Intensive care medicine* 2000;26(7):908-14.
7. Carrera P, Thongprayoon C, Cheungpasitporn W, et al. Epidemiology and outcome of new-onset atrial fibrillation in the medical intensive care unit. *Journal of critical care* 2016;36:102-06.
8. Chen AY, Sokol SS, Kress JP, et al. New-onset atrial fibrillation is an independent predictor of mortality in medical intensive care unit patients. *The Annals of pharmacotherapy* 2015;49(5):523-7.
9. Makrygiannis SS, Margariti A, Rizikou D, et al. Incidence and predictors of new-onset atrial fibrillation in noncardiac intensive care unit patients. *Journal of critical care* 2014;29(4):697 e1-5.
10. Meierhenrich R, Steinhilber E, Eggermann C, et al. Incidence and prognostic impact of new-onset atrial fibrillation in patients with septic shock: a prospective observational study. *Critical care (London, England)* 2010;14(3):R108.
11. Salman S, Bajwa A, Gajic O, et al. Paroxysmal atrial fibrillation in critically ill patients with sepsis. *Journal of intensive care medicine* 2008;23(3):178-83.
12. Pozzoli M, Cioffi G, Traversi E, et al. Predictors of primary atrial fibrillation and concomitant clinical and hemodynamic changes in patients with chronic heart failure: a prospective study in 344 patients with baseline sinus rhythm. *Journal of the American College of Cardiology* 1998;32(1):197-204.
13. Walkey AJ, Wiener RS, Ghobrial JM, et al. Incident stroke and mortality associated with new-onset atrial fibrillation in patients hospitalized with severe sepsis. *Jama* 2011;306(20):2248-54.
14. Kuipers S, Klein Klouwenberg PM, Cremer OL. Incidence, risk factors and outcomes of new-onset atrial fibrillation in patients with sepsis: a systematic review. *Crit Care* 2014;18(6):688.
15. Arora S, Lang I, Nayyar V, et al. Atrial fibrillation in a tertiary care multidisciplinary intensive care unit - Incidence and risk factors. *Anaesthesia and intensive care* 2007;35(5):707-13.
16. Seguin P, Signouret T, Laviolle B, et al. Incidence and risk factors of atrial fibrillation in a surgical intensive care unit. *Critical care medicine* 2004;32(3):722-6.
17. Seguin P, Laviolle B, Maurice A, et al. Atrial fibrillation in trauma patients requiring intensive care. *Intensive care medicine* 2006;32(3):398-404.

18. Yoshida T, Fujii T, Uchino S, et al. Epidemiology, prevention, and treatment of new-onset atrial fibrillation in critically ill: a systematic review. *Journal of intensive care* 2015;3(1):19.
19. Shamseer L, Moher D, Clarke M, et al. Preferred reporting items for systematic review and meta-analysis protocols (PRISMA-P) 2015: elaboration and explanation. *BMJ (Clinical research ed)* 2015;350:g7647.
20. Wells G, Shea B, O'connell D, et al. The Newcastle-Ottawa Scale (NOS) for assessing the quality of nonrandomised studies in meta-analyses. Ottawa Hospital Research Institute, 2014: oxford. asp, 2015.
21. Duckitt K, Harrington D. Risk factors for pre-eclampsia at antenatal booking: systematic review of controlled studies. *BMJ (Clinical research ed)* 2005;330(7491):565.
22. Zaal IJ, Devlin JW, Peelen LM, et al. A systematic review of risk factors for delirium in the ICU. *Critical care medicine* 2015;43(1):40-7.
23. Dettmer MR, Damuth E, Zarbiv S, et al. Prognostic Factors for Long-Term Mortality in Critically Ill Patients Treated With Prolonged Mechanical Ventilation: A Systematic Review. *Critical care medicine* 2017;45(1):69-74.

## APPENDIX 1

PRISMA-P (Preferred Reporting Items for Systematic review and Meta-Analysis Protocols) 2015 checklist: recommended items to address in a systematic review protocol\*

| Section topic                     | Item | Checklist item                                                                                                                                                                                  | Present in review Y/N | Page and line      |
|-----------------------------------|------|-------------------------------------------------------------------------------------------------------------------------------------------------------------------------------------------------|-----------------------|--------------------|
| <b>ADMINISTRATIVE INFORMATION</b> |      |                                                                                                                                                                                                 |                       |                    |
| <b>Title:</b>                     |      |                                                                                                                                                                                                 |                       |                    |
| Identification                    | 1a   | Identify the report as a protocol of a systematic review                                                                                                                                        | Yes                   | Page 1 Line 2      |
| Update                            | 1b   | If the protocol is for an update of a previous systematic review, identify as such                                                                                                              | No                    | -                  |
| Registration                      | 2    | If registered, provide the name of the registry (such as PROSPERO) and registration number                                                                                                      | Yes                   | Page 3 Line 30-31  |
| <b>Authors:</b>                   |      |                                                                                                                                                                                                 |                       |                    |
| Contact                           | 3a   | Provide name, institutional affiliation, e-mail address of all protocol authors; provide physical mailing address of corresponding author                                                       | Yes                   | Page 1 Lines 4-6   |
| Contributions                     | 3b   | Describe contributions of protocol authors and identify the guarantor of the review                                                                                                             | Yes                   | Page 6 Lines 21-24 |
| Amendments                        | 4    | If the protocol represents an amendment of a previously completed or published protocol, identify as such and list changes; otherwise, state plan for documenting important protocol amendments | No                    | -                  |
| <b>Support:</b>                   |      |                                                                                                                                                                                                 |                       |                    |
| Sources                           | 5a   | Indicate sources of financial or other support for the review                                                                                                                                   | Yes                   | Page 6 Lines 15-17 |
| Sponsor                           | 5b   | Provide name for the review funder and/or sponsor                                                                                                                                               | Yes                   | Page 6 Lines 15-17 |
| Role of sponsor or funder         | 5c   | Describe roles of funder(s), sponsor(s), and/or institution(s), if any, in developing the protocol                                                                                              | Yes                   | Page 6 Line 15-17  |
| <b>INTRODUCTION</b>               |      |                                                                                                                                                                                                 |                       |                    |
| Rationale                         | 6    | Describe the rationale for the review in the context of what is already known                                                                                                                   | Yes                   | Page 3 Lines 2-24  |

|            |   |                                                                                                                                                          |     |                    |
|------------|---|----------------------------------------------------------------------------------------------------------------------------------------------------------|-----|--------------------|
| Objectives | 7 | Provide an explicit statement of the question(s) the review will address with reference to participants, interventions, comparators, and outcomes (PICO) | Yes | Page 3 Lines 26-27 |
|------------|---|----------------------------------------------------------------------------------------------------------------------------------------------------------|-----|--------------------|

## METHODS

|                                    |     |                                                                                                                                                                                                                               |     |                                        |
|------------------------------------|-----|-------------------------------------------------------------------------------------------------------------------------------------------------------------------------------------------------------------------------------|-----|----------------------------------------|
| Eligibility criteria               | 8   | Specify the study characteristics (such as PICO, study design, setting, time frame) and report characteristics (such as years considered, language, publication status) to be used as criteria for eligibility for the review | Yes | Page 4 Lines 10-39<br>Page 5 Lines 1-5 |
| Information sources                | 9   | Describe all intended information sources (such as electronic databases, contact with study authors, trial registers or other grey literature sources) with planned dates of coverage                                         | Yes | Page 3 Lines 33-37                     |
| Search strategy                    | 10  | Present draft of search strategy to be used for at least one electronic database, including planned limits, such that it could be repeated                                                                                    | Yes | Page 10 Lines 2-34                     |
| Study records:                     |     |                                                                                                                                                                                                                               |     |                                        |
| Data management                    | 11a | Describe the mechanism(s) that will be used to manage records and data throughout the review                                                                                                                                  | Yes | Page 4 Lines 5-7                       |
| Selection process                  | 11b | State the process that will be used for selecting studies (such as two independent reviewers) through each phase of the review (that is, screening, eligibility and inclusion in meta-analysis)                               | Yes | Page 3 Lines 39-42<br>Page 4 Lines 1-3 |
| Data collection process            | 11c | Describe planned method of extracting data from reports (such as piloting forms, done independently, in duplicate), any processes for obtaining and confirming data from investigators                                        | Yes | Page 5 Lines 7-12                      |
| Data items                         | 12  | List and define all variables for which data will be sought (such as PICO items, funding sources), any pre-planned data assumptions and simplifications                                                                       | Yes | Page 5 Lines 9-11                      |
| Outcomes and prioritization        | 13  | List and define all outcomes for which data will be sought, including prioritization of main and additional outcomes, with rationale                                                                                          | Yes | Page 4 Line 20-25                      |
| Risk of bias in individual studies | 14  | Describe anticipated methods for assessing risk of bias of individual studies, including whether this will be done at the outcome or study level, or both; state how this information will be used in data synthesis          | Yes | Page 5 Lines 14-18                     |
| Data synthesis                     | 15a | Describe criteria under which study data will be quantitatively synthesised                                                                                                                                                   | Yes | Page 5 Lines 20-27                     |

1  
2  
3  
4  
5  
6  
7  
8  
9  
10  
11  
12  
13  
14  
15  
16  
17  
18  
19  
20  
21  
22  
23  
24  
25  
26  
27  
28  
29  
30  
31  
32  
33  
34  
35  
36  
37  
38  
39  
40  
41  
42  
43  
44  
45  
46  
47

|                                   |     |                                                                                                                                                                                                                                                     |     |                    |
|-----------------------------------|-----|-----------------------------------------------------------------------------------------------------------------------------------------------------------------------------------------------------------------------------------------------------|-----|--------------------|
|                                   | 15b | If data are appropriate for quantitative synthesis, describe planned summary measures, methods of handling data and methods of combining data from studies, including any planned exploration of consistency (such as I <sup>2</sup> , Kendall’s τ) | Yes | Page 5 Lines 20-27 |
|                                   | 15c | Describe any proposed additional analyses (such as sensitivity or subgroup analyses, meta-regression)                                                                                                                                               | No  |                    |
|                                   | 15d | If quantitative synthesis is not appropriate, describe the type of summary planned                                                                                                                                                                  | Yes | Page 5 Lines 20-27 |
| Meta-bias(es)                     | 16  | Specify any planned assessment of meta-bias(es) (such as publication bias across studies, selective reporting within studies)                                                                                                                       | No  | -                  |
| Confidence in cumulative evidence | 17  | Describe how the strength of the body of evidence will be assessed (such as GRADE)                                                                                                                                                                  | Yes | Page 5 Lines 20-27 |

*From: Shamseer L, Moher D, Clarke M, Ghersi D, Liberati A, Petticrew M, Shekelle P, Stewart L, PRISMA-P Group. Preferred reporting items for systematic review and meta-analysis protocols (PRISMA-P) 2015: elaboration and explanation. BMJ. 2015 Jan 2;349(jan02 1):g7647.*

Peer review only

## APPENDIX 2

Draft search strategy for Medline

|     |                                                                                        |
|-----|----------------------------------------------------------------------------------------|
| 1.  | ATRIAL FIBRILLATION/                                                                   |
| 2.  | ATRIAL FLUTTER/                                                                        |
| 3.  | SUPRAVENTRICULAR TACHYCARDIA/                                                          |
| 4.  | "atrial fibrillation* ".ab,ti.                                                         |
| 5.  | "atrial flutter* ".ab,ti.                                                              |
| 6.  | "supraventricular tachycardia* ".ab,ti.                                                |
| 7.  | 1 or 2 or 3 or 4 or 5 or 6                                                             |
| 8.  | INTENSIVE CARE/                                                                        |
| 9.  | INTENSIVE CARE UNIT/                                                                   |
| 10. | CRITICAL CARE/                                                                         |
| 11. | "intensive care".ab,ia,in,ti.                                                          |
| 12. | "critical care".ab,ia,in,ti.                                                           |
| 13. | "critical*".ab,ia,in,ti.                                                               |
| 14. | (ITU or ICU or AICU).ab,ia,in,ti.                                                      |
| 15. | 8 or 9 or 10 or 11 or 12 or 13 or 14                                                   |
| 16. | RISK FACTORS/                                                                          |
| 17. | EPIDEMIOLOGY/                                                                          |
| 18. | "risk factor*".ab,ti.                                                                  |
| 19. | "epidemiology".ab,ti.                                                                  |
| 20. | "*etiology".ab,ti.                                                                     |
| 21. | BIOCHEMICAL MARKER/                                                                    |
| 22. | BIOLOGIC MARKER/                                                                       |
| 23. | CLINICAL MARKER/                                                                       |
| 24. | "determinant*".ab,ti.                                                                  |
| 25. | "precursor*".ab,ti.                                                                    |
| 26. | "antecedent*".ab,ti.                                                                   |
| 27. | "precursor*".ab,ti.                                                                    |
| 28. | "predict*".ab,ti.                                                                      |
| 29. | "trigger*".ab,ti.                                                                      |
| 30. | "marker*".ab,ti.                                                                       |
| 31. | 16 or 17 or 18 or 19 or 20 or 21 or 22 or 23 or 24 or 25 or 26 or 27 or 28 or 29 or 30 |
| 32. | 7 and 15 and 31                                                                        |

## APPENDIX 3

### NEWCASTLE - OTTAWA QUALITY ASSESSMENT SCALE

Note: A study can be awarded a maximum of one star for each numbered item within the Selection and Outcome categories. A maximum of two stars can be given for Comparability

#### Selection

1. Representativeness of the study population
  - a. Truly representative of the general adult ICU population ★
  - b. Somewhat representative of the general adult ICU population ★
  - c. Poorly representative of the general adult ICU population
  - d. No description of the derivation of the cohort
2. Demonstration that outcome of interest was not present at start of study
  - a. Exclusion of AF (current and historic) described ★
  - b. AF (current and historic) excluded but no description
3. Ascertainment of presence of risk factor
  - a. Medical record or investigation result ★
  - b. Structured interview ★
  - c. Written self-report
  - d. No description or none of the above
4. Study size
  - a.  $\geq 100$  participants in each group ★
  - b.  $< 100$  participants in each group

#### Comparability

1. Comparability of cohorts on the basis of the design or analysis
  - a. Study design controls for confounding factors ★
  - b. Study controls for confounding factors in data analysis ★

#### Outcome

1. Study design
  - a. Prospective ★
  - b. Retrospective
2. Assessment of outcome
  - a. Independent assessment of heart rhythm from primary source (e.g. monitor / ECG) ★
  - b. Non-independent assessment or heart rhythm identified from secondary source (e.g. patient records)
  - c. Other identification of heart rhythm
  - d. No description
3. Adequacy of follow up of cohorts
  - a. complete follow up - all subjects accounted for ★
  - b. subjects lost to follow up unlikely to introduce bias - small number lost -  $\geq 90\%$  follow up, or description provided of those lost) ★
  - c. follow up rate  $< 90\%$  and no description of those lost
  - d. no statement

## APPENDIX 1

PRISMA-P (Preferred Reporting Items for Systematic review and Meta-Analysis Protocols) 2015 checklist: recommended items to address in a systematic review protocol\*

| Section topic                     | Item | Checklist item                                                                                                                                                                                  | Present in review Y/N | Page and line      |
|-----------------------------------|------|-------------------------------------------------------------------------------------------------------------------------------------------------------------------------------------------------|-----------------------|--------------------|
| <b>ADMINISTRATIVE INFORMATION</b> |      |                                                                                                                                                                                                 |                       |                    |
| <b>Title:</b>                     |      |                                                                                                                                                                                                 |                       |                    |
| Identification                    | 1a   | Identify the report as a protocol of a systematic review                                                                                                                                        | Yes                   | Page 1 Line 2      |
| Update                            | 1b   | If the protocol is for an update of a previous systematic review, identify as such                                                                                                              | No                    | -                  |
| Registration                      | 2    | If registered, provide the name of the registry (such as PROSPERO) and registration number                                                                                                      | Yes                   | Page 3 Line 30-31  |
| <b>Authors:</b>                   |      |                                                                                                                                                                                                 |                       |                    |
| Contact                           | 3a   | Provide name, institutional affiliation, e-mail address of all protocol authors; provide physical mailing address of corresponding author                                                       | Yes                   | Page 1 Lines 4-6   |
| Contributions                     | 3b   | Describe contributions of protocol authors and identify the guarantor of the review                                                                                                             | Yes                   | Page 6 Lines 21-24 |
| Amendments                        | 4    | If the protocol represents an amendment of a previously completed or published protocol, identify as such and list changes; otherwise, state plan for documenting important protocol amendments | No                    | -                  |
| <b>Support:</b>                   |      |                                                                                                                                                                                                 |                       |                    |
| Sources                           | 5a   | Indicate sources of financial or other support for the review                                                                                                                                   | Yes                   | Page 6 Lines 15-17 |
| Sponsor                           | 5b   | Provide name for the review funder and/or sponsor                                                                                                                                               | Yes                   | Page 6 Lines 15-17 |
| Role of sponsor or funder         | 5c   | Describe roles of funder(s), sponsor(s), and/or institution(s), if any, in developing the protocol                                                                                              | Yes                   | Page 6 Line 15-17  |
| <b>INTRODUCTION</b>               |      |                                                                                                                                                                                                 |                       |                    |
| Rationale                         | 6    | Describe the rationale for the review in the context of what is already known                                                                                                                   | Yes                   | Page 3 Lines 2-24  |



|            |   |                                                                                                                                                          |     |                    |
|------------|---|----------------------------------------------------------------------------------------------------------------------------------------------------------|-----|--------------------|
| Objectives | 7 | Provide an explicit statement of the question(s) the review will address with reference to participants, interventions, comparators, and outcomes (PICO) | Yes | Page 3 Lines 26-27 |
|------------|---|----------------------------------------------------------------------------------------------------------------------------------------------------------|-----|--------------------|

## METHODS

|                                    |     |                                                                                                                                                                                                                               |     |                                        |
|------------------------------------|-----|-------------------------------------------------------------------------------------------------------------------------------------------------------------------------------------------------------------------------------|-----|----------------------------------------|
| Eligibility criteria               | 8   | Specify the study characteristics (such as PICO, study design, setting, time frame) and report characteristics (such as years considered, language, publication status) to be used as criteria for eligibility for the review | Yes | Page 4 Lines 10-39<br>Page 5 Lines 1-5 |
| Information sources                | 9   | Describe all intended information sources (such as electronic databases, contact with study authors, trial registers or other grey literature sources) with planned dates of coverage                                         | Yes | Page 3 Lines 33-37                     |
| Search strategy                    | 10  | Present draft of search strategy to be used for at least one electronic database, including planned limits, such that it could be repeated                                                                                    | Yes | Page 10 Lines 2-34                     |
| Study records:                     |     |                                                                                                                                                                                                                               |     |                                        |
| Data management                    | 11a | Describe the mechanism(s) that will be used to manage records and data throughout the review                                                                                                                                  | Yes | Page 4 Lines 5-7                       |
| Selection process                  | 11b | State the process that will be used for selecting studies (such as two independent reviewers) through each phase of the review (that is, screening, eligibility and inclusion in meta-analysis)                               | Yes | Page 3 Lines 39-42<br>Page 4 Lines 1-3 |
| Data collection process            | 11c | Describe planned method of extracting data from reports (such as piloting forms, done independently, in duplicate), any processes for obtaining and confirming data from investigators                                        | Yes | Page 5 Lines 7-12                      |
| Data items                         | 12  | List and define all variables for which data will be sought (such as PICO items, funding sources), any pre-planned data assumptions and simplifications                                                                       | Yes | Page 5 Lines 9-11                      |
| Outcomes and prioritization        | 13  | List and define all outcomes for which data will be sought, including prioritization of main and additional outcomes, with rationale                                                                                          | Yes | Page 4 Line 20-25                      |
| Risk of bias in individual studies | 14  | Describe anticipated methods for assessing risk of bias of individual studies, including whether this will be done at the outcome or study level, or both; state how this information will be used in data synthesis          | Yes | Page 5 Lines 14-18                     |
| Data synthesis                     | 15a | Describe criteria under which study data will be quantitatively synthesised                                                                                                                                                   | Yes | Page 5 Lines 20-27                     |

|                                   |                                                                                                                                                                                                                                                  |     |                    |
|-----------------------------------|--------------------------------------------------------------------------------------------------------------------------------------------------------------------------------------------------------------------------------------------------|-----|--------------------|
| 15b                               | If data are appropriate for quantitative synthesis, describe planned summary measures, methods of handling data and methods of combining data from studies, including any planned exploration of consistency (such as $I^2$ , Kendall's $\tau$ ) | Yes | Page 5 Lines 20-27 |
| 15c                               | Describe any proposed additional analyses (such as sensitivity or subgroup analyses, meta-regression)                                                                                                                                            | No  |                    |
| 15d                               | If quantitative synthesis is not appropriate, describe the type of summary planned                                                                                                                                                               | Yes | Page 5 Lines 20-27 |
| Meta-bias(es)                     | 16 Specify any planned assessment of meta-bias(es) (such as publication bias across studies, selective reporting within studies)                                                                                                                 | No  | -                  |
| Confidence in cumulative evidence | 17 Describe how the strength of the body of evidence will be assessed (such as GRADE)                                                                                                                                                            | Yes | Page 5 Lines 20-27 |

From: Shamseer L, Moher D, Clarke M, Ghersi D, Liberati A, Petticrew M, Shekelle P, Stewart L, PRISMA-P Group. Preferred reporting items for systematic review and meta-analysis protocols (PRISMA-P) 2015: elaboration and explanation. *BMJ*. 2015 Jan 2;349

1  
2  
3  
4  
5  
6  
7  
8  
9  
10  
11  
12  
13  
14  
15  
16  
17  
18  
19  
20  
21  
22  
23  
24  
25  
26  
27  
28  
29  
30  
31  
32  
33  
34  
35  
36  
37  
38  
39  
40  
41  
42  
43  
44  
45  
46  
47  
48  
49  
50  
51  
52  
53  
54  
55  
56  
57  
58  
59  
60

For peer review only

# BMJ Open

## Risk factors for new-onset atrial fibrillation on the general adult ICU: Protocol for a systematic review

|                                 |                                                                                                                                                                                                                                                                                                                                                                                                                                         |
|---------------------------------|-----------------------------------------------------------------------------------------------------------------------------------------------------------------------------------------------------------------------------------------------------------------------------------------------------------------------------------------------------------------------------------------------------------------------------------------|
| Journal:                        | <i>BMJ Open</i>                                                                                                                                                                                                                                                                                                                                                                                                                         |
| Manuscript ID                   | bmjopen-2018-024640.R1                                                                                                                                                                                                                                                                                                                                                                                                                  |
| Article Type:                   | Protocol                                                                                                                                                                                                                                                                                                                                                                                                                                |
| Date Submitted by the Author:   | 20-Jul-2018                                                                                                                                                                                                                                                                                                                                                                                                                             |
| Complete List of Authors:       | Bedford, Jonathan; University of Oxford, Nuffield Department of Clinical Neurosciences<br>Harford, Mirae; University of Oxford, Nuffield Department of Clinical Neurosciences<br>Petricic, Tatjana; University of Oxford, Bodleian Health Care Libraries<br>Young, Duncan; University of Oxford, Nuffield Department of Clinical Neurosciences<br>Watkinson, Peter; University of Oxford, Nuffield Department of Clinical Neurosciences |
| <b>Primary Subject Heading</b>: | Intensive care                                                                                                                                                                                                                                                                                                                                                                                                                          |
| Secondary Subject Heading:      | Cardiovascular medicine, Epidemiology, Anaesthesia, Evidence based practice                                                                                                                                                                                                                                                                                                                                                             |
| Keywords:                       | INTENSIVE & CRITICAL CARE, Adult cardiology < CARDIOLOGY, EPIDEMIOLOGY                                                                                                                                                                                                                                                                                                                                                                  |
|                                 |                                                                                                                                                                                                                                                                                                                                                                                                                                         |

SCHOLARONE™  
Manuscripts

1  
2  
3 1 Risk factors for new-onset atrial fibrillation on the  
4  
5 2 general adult ICU: Protocol for a systematic review  
6

7 3 Jonathan Bedford<sup>1</sup>, Mirae Harford<sup>1</sup>, Tatjana Petrinic<sup>2</sup>, Duncan Young<sup>1</sup> and Peter Watkinson<sup>1</sup>  
8

9 4 Correspondence: Jonathan.Bedford@ndcn.ox.ac.uk

10 5 <sup>1</sup>Nuffield Department of Clinical Neurosciences, University of Oxford, Oxford, UK.

11 6 <sup>2</sup>Bodleian Health Care Libraries, University of Oxford, Oxford, UK.  
12  
13

14 8 Word count: 1740

15 9 Keywords: Atrial fibrillation, risk factors, critical illness, intensive care units, intensive care  
16  
17  
18  
19  
20  
21  
22  
23  
24  
25  
26  
27  
28  
29  
30  
31  
32  
33  
34  
35  
36  
37  
38  
39  
40  
41  
42  
43  
44  
45  
46  
47  
48  
49  
50  
51  
52  
53  
54  
55  
56  
57  
58  
59  
60

## 1 **ABSTRACT**

### 2 **Introduction**

3 Atrial fibrillation (AF) is a common arrhythmia in the critical care environment. New-onset AF is  
4 associated with increased mortality and intensive care unit (ICU) length of stay. Observational  
5 studies have identified several epidemiologic and disease severity-related factors associated with  
6 developing new-onset AF on the ICU. However, there is limited data on the modifiable risk-factors in  
7 the general adult ICU population.

8 We describe a protocol for a systematic review of modifiable and non-modifiable risk factors for  
9 new-onset AF in the general adult ICU population. The results of this review will aid the  
10 development of risk prediction tools and inform future research into AF prevention on the ICU.

### 11 **Methods and analysis**

12 MEDLINE, EMBASE and the Cochrane Library, including Cochrane Database of Systematic Reviews  
13 and the Cochrane Central Register of Controlled Trials (CENTRAL) will be searched for studies that  
14 assess the association of patient variables, investigation results, interventions and diagnoses  
15 associated with subsequent new-onset atrial fibrillation on the ICU.

16 Only studies involving adult patients admitted to non-service-specific ICUs will be included. We will  
17 extract data relating to the statistical association between reversible and non-reversible factors and  
18 AF, the quality of the studies and the generalisability of the results. This systematic review will be  
19 reported according to the Preferred Reporting Items for Systematic reviews and Meta-Analyses  
20 (PRISMA).

### 21 **Ethics and dissemination**

22 This proposed systematic review will be based on published data, and therefore ethical approval is  
23 not required. The findings of this study will be disseminated through publication in a peer reviewed  
24 journal and will be presented at conferences.

### 25 **Trial registration number**

26 CRD42017074221.

## 27 **ARTICLE SUMMARY**

### 28 **Strengths and limitations of this study**

- 29 • New-onset atrial fibrillation in intensive care is a common and important condition
- 30 • This protocol will ensure a targeted and comprehensive analysis of this poorly-understood  
31 phenomenon
- 32 • This protocol addresses issues with previous reviews in this area
- 33 • This protocol will guide an unbiased systematic review based on agreed best practice  
34 principles
- 35 • The results of this review will inform current practice and aid the development of risk  
36 prediction tools

## 1 INTRODUCTION

2 New-onset atrial fibrillation (AF) in intensive care is defined for the purposes of this protocol as AF  
3 occurring after admission to ICU in a patient with no known history of chronic or paroxysmal AF. It is  
4 the most common arrhythmia in critically ill patients<sup>1,2</sup>. It is particularly common after cardiac  
5 surgery, with a prevalence ranging from 10-65% depending on the nature of the surgery<sup>3</sup>. Data  
6 regarding new-onset AF in non-service-specific intensive care units (ICUs) is more limited.  
7 Observational data suggest new-onset AF occurs in 4.5-15% of patients in this setting<sup>4-9</sup> and up to  
8 46% of patients with septic shock<sup>10</sup>.

9 New-onset AF in critically ill patients is associated with increased mortality and length of stay<sup>1 8 11</sup>. It  
10 is unclear whether AF itself is an independent contributor to poor outcome, or rather a marker of  
11 disease severity<sup>7</sup>. However, given the detrimental effects of AF on cardiac output and filling  
12 pressures, it is feasible that the arrhythmia itself contributes to increased mortality<sup>12</sup>. Furthermore,  
13 atrial fibrillation in critically ill patients is associated with thromboembolic complications and these  
14 may contribute to poorer outcomes<sup>13</sup>.

15 Risk factors for developing AF on the ICU include patient factors such as increasing age or presence  
16 of comorbidities, and ICU interventions including renal replacement therapy, vasopressor use and  
17 the use of pulmonary artery catheters<sup>7 9 13</sup>. The risk of developing new-onset AF also increases with  
18 increasing disease severity e.g. APACHE score<sup>7</sup>. Whilst a systematic review of AF risk factors in sepsis  
19 has been undertaken<sup>14</sup>, this included studies that did not exclude patients with potential prior or  
20 paroxysmal AF<sup>15-17</sup>. A systematic review has also been undertaken in the general adult ICU  
21 population<sup>18</sup>. However, this again did not focus on true new-onset AF, and did not provide an  
22 evidence synthesis.

23 There is a paucity of data around reversible / modifiable antecedents in this context. Current  
24 practice of preventing atrial fibrillation in critically ill patients is variable and not based on robust  
25 evidence. Given the potential morbidity and mortality associated with new-onset AF on the ICU, a  
26 better understanding of modifiable and non-modifiable risk factors may improve patient care and  
27 outcomes.

## 28 OBJECTIVE

29 We will conduct a systematic review to identify studies of factors that are associated with an  
30 increased risk of new-onset atrial fibrillation in adult patients on non-service specific intensive care  
31 units.

## 32 METHODS

33 This protocol will adhere to the requirements of Preferred Reporting Items for Systematic Reviews  
34 and Meta-Analyses Protocol (PRISMA-P)<sup>19</sup> (Appendix 1). The protocol is registered, PROSPERO:  
35 CRD42017074221.

## 36 Patient and public involvement

37 We have involved the Oxford ICU patient forum. This is a cohort participants previously managed on  
38 Oxford ICUs and their relatives. They are recruited from the ICU follow-up clinic. Within this group  
39 are members who experienced atrial fibrillation during their stay. They stressed the importance of  
40 producing evidence to guide the prevention and management strategies for new-onset AF on the  
41 ICU. They felt the phenomenon was poorly understood, including investigations and management  
42 after discharge.

## 1 **Search strategy**

2 Papers will be identified by searching Medical Literature Analysis and Retrieval System Online  
3 (MEDLINE), Excerpta Medica database (EMBASE), the Cochrane Database of Systematic Reviews and  
4 the Cochrane Central Register of Controlled Trials (CENTRAL). MEDLINE and EMBASE will be accessed  
5 via the Ovid platform. We will include additional papers from other sources including the references  
6 of reviews articles or studies identified during screening. A full description of the search strategy is  
7 outlined in Appendix 2.

## 8 **Study selection**

9 Two reviewers will independently undertake initial relevance screening of titles and abstracts. The  
10 researchers will not be blinded to the journal titles or to the study authors or institutions. If there is  
11 disagreement or uncertainty regarding eligibility, the article will be included in the next stage of  
12 screening for further analysis for inclusion/exclusion. The full text will be retrieved for all articles not  
13 excluded by the initial screening. These papers will be assessed against the inclusion and exclusion  
14 criteria. Disagreements about eligibility will be resolved by discussion between the screening  
15 researchers or a third party.

## 16 **Data management**

17 We will use Covidence (Veritas Health Innovation Ltd., Melbourne, Australia) software to identify  
18 duplicate records and for relevance screening. We will use a reference manager program  
19 (EndNoteX8, Clarivate Analytics, Philadelphia, USA) to store identified citations and their electronic  
20 text.

## 21 **Inclusion criteria**

### 22 **Types of studies**

23 Quantitative studies published in peer reviewed journals assessing adults will be eligible for inclusion  
24 in this review. Studies are likely to be prospective or retrospective cohort or case-control studies.

### 25 **Study characteristics**

26 Eligible studies must include both a cohort of patients who developed new-onset atrial-fibrillation  
27 and a cohort who did not. They must include at least one risk factor that was investigated. The  
28 studies must be based in non-service-specific ICUs. These will include general medical, surgical or  
29 mixed ICUs. Studies of cohorts defined by a single disease or narrow group of diseases (e.g.  
30 myocardial infarction or sepsis) will be included. Identified studies published from January 1970 until  
31 the day of search completion will be included.

### 32 **Phenomenon of interest**

33 Studies must describe a statistical relationship between a patient-derived variable (e.g. age, blood  
34 pressure or serum potassium level) and the development of new-onset atrial fibrillation. 'Diagnosis'  
35 may be included as a variable. We will include studies that group atrial fibrillation with atrial flutter,  
36 and we will include studies investigating new-onset supraventricular arrhythmias, providing atrial  
37 fibrillation constituted at least 70% of arrhythmia episodes.

### 38 **Population**

39 Studies that sample adult patients admitted to the ICU types specified above will be considered for  
40 inclusion.

41 For the purpose of this review, an adult is defined as  $\geq 16$  years of age. There will be no other  
42 restrictions.



## 1 **Exclusion criteria**

### 2 **Types of studies**

3 Qualitative studies, case studies, editorials, letters, practice guidelines and abstract-only reports will  
4 be excluded.

### 5 **Study characteristics**

6 Studies of cohorts defined by a single procedure or narrow group of procedures (e.g.  
7 appendectomy or hepatobiliary surgery) will be excluded. Studies based on service-specific (e.g.  
8 cardiac, cardiothoracic surgical or neurosurgical) ICUs will also be excluded. Studies published in a  
9 language other than English will be excluded.

### 10 **Phenomenon of interest**

11 Studies will be excluded if no risk factors are analysed. Studies that do not explicitly exclude or  
12 separate patients with a history of chronic or paroxysmal AF will be excluded. Studies that do not  
13 specify arrhythmia type will also be excluded.

### 14 **Population**

15 Studies of participants under 16 years old will be excluded.

## 16 **Data extraction**

17 Data will be extracted from identified full text articles and supplementary material. One researcher  
18 (JB) will be responsible for data extraction. All uncertainties regarding data extraction will be  
19 resolved by discussion amongst the study team. Extracted data will include: 1) characteristics of  
20 study setting and patient population; 2) study methodology (including ascertainment of risk factors,  
21 definition and assessment of outcome, and control of confounding variables); 3) risk factor estimates  
22 including measures quantifying risk, confidence intervals and p-values for statistical significance. We  
23 will extract risk ratios identified through both univariate and multivariate analysis and record the  
24 analysis method. We will populate pre-specified data extraction tables. Where insufficient data is  
25 presented we will request additional data from the authors.

## 26 **Risk of bias assessment**

27 We will assess risk of bias using an adapted Newcastle-Ottawa Scale (NOS)<sup>20</sup>. The NOS is a scoring  
28 system designed to assess the quality of non-randomised studies in meta-analyses. Scores are  
29 attributed to each paper after assessing domains including the selection of study groups, the  
30 comparability of the groups and the ascertainment of the outcome of interest. We have  
31 incorporated adaptations from a previous systematic review of risk factors<sup>21</sup>. We have further  
32 modified this with the intention of best evaluating our phenomenon of interest. The scoring system  
33 used in this systematic review will allocate scores from zero to nine and is outlined in Appendix 3.

## 34 **Data synthesis and analysis**

35 We will extract summary comparison data as odds ratios (95% confidence intervals) where possible.  
36 Where sufficient original data is presented we will calculate risk ratios. We will then conduct a semi-  
37 quantitative synthesis of results from included studies using a method previously described by Zaal,  
38 et al.<sup>22</sup> and adapted by Dettmer, et al.<sup>23</sup>. Identified variables with associated p-values of  $\leq 0.05$  or  
39 95% confidence intervals that do not cross 1 will be allocated a relative strength. This will be based  
40 on a composite of the number of articles in which an association is identified, and the  
41 methodological quality of those articles as defined by our adapted NOS. Criteria for strength of  
42 evidence is outlined in table 1.

1 *Table 1 - Level of evidence for risk factors for new-onset atrial fibrillation*

| Level of evidence | Criteria                                                                                                                                                            |
|-------------------|---------------------------------------------------------------------------------------------------------------------------------------------------------------------|
| Strong evidence   | Consistent findings in $\geq 2$ high quality studies (adapted NOS score 8-9)<br>AND no conflicting studies                                                          |
| Moderate evidence | Consistent findings in 1 high quality study<br>AND $\geq 1$ acceptable quality study (adapted NOS score 6-7)<br>AND no conflicting studies                          |
| Weak evidence     | Consistent findings in $\geq 3$ low quality studies (adapted NOS score $\leq 5$ )<br>OR $\geq 2$ acceptable quality studies<br>OR 1 high quality study in isolation |

## DISCUSSION

Several epidemiological and disease severity-related factors have been associated with new-onset atrial fibrillation on the ICU in observational studies. These have not yet been investigated in the general adult ICU population in a systematic review with an evidence synthesis. Data is also limited regarding modifiable or reversible risk factors; available evidence is scarce regarding specific patient vital signs, laboratory results or ICU procedures that may increase the risk of AF. Current clinical practice is therefore variable and not evidence-based.

The findings from this review will contribute towards an improved understanding of the modifiable and non-modifiable antecedents of new-onset AF on the ICU. It may lead to a clinically useful risk-prediction model and inform future research into AF prevention on the ICU. Given the high prevalence and significant associated morbidity and mortality of new-onset AF on the ICU, optimal prevention strategies may result in improved patient outcomes.

## DECLARATIONS

### Abbreviations

AF: atrial fibrillation; CENTRAL: The Cochrane Database of Systematic Reviews and the Cochrane Central Register of Controlled Trials; EMBASE: Excerpta Medica database; ICU: Intensive care unit; MEDLINE: Medical Literature Analysis and Retrieval System Online; PRISMA-P: Preferred Reporting Items for Systematic Reviews and Meta-analyses Protocol.

### Funding

This work has been funded by the National Institute for Health Research (NIHR) and by the NIHR Biomedical Research Centre (Oxford). These funders played no role in developing the review. All views expressed are those of the authors and not necessarily those of the Department of Health or NIHR.

### Availability of data and materials

Not applicable.

### Author contributions

JB, MH, DY and PW have substantially contributed to the design of the systematic review protocol. TP has developed the search strategy. JB, DY and PW wrote this manuscript. All authors read and approved the final manuscript. The funders have not been involved in the study design or reporting. PW is guarantor of this review. The authors would like to thank the patients involved in the development of this protocol.



- 1  
2  
3 1 17. Seguin P, Laviolle B, Maurice A, et al. Atrial fibrillation in trauma patients requiring intensive care.  
4 2 *Intensive care medicine* 2006;32(3):398-404.  
5 3 18. Yoshida T, Fujii T, Uchino S, et al. Epidemiology, prevention, and treatment of new-onset atrial  
6 4 fibrillation in critically ill: a systematic review. *Journal of intensive care* 2015;3(1):19.  
7 5 19. Shamseer L, Moher D, Clarke M, et al. Preferred reporting items for systematic review and meta-  
8 6 analysis protocols (PRISMA-P) 2015: elaboration and explanation. *BMJ (Clinical research ed)*  
9 7 2015;350:g7647.  
10 8 20. Wells G, Shea B, O'connell D, et al. The Newcastle-Ottawa Scale (NOS) for assessing the quality of  
11 9 nonrandomised studies in meta-analyses. Ottawa Hospital Research Institute, 2014: oxford.  
12 10 asp, 2015.  
13 11 21. Duckitt K, Harrington D. Risk factors for pre-eclampsia at antenatal booking: systematic review of  
14 12 controlled studies. *BMJ (Clinical research ed)* 2005;330(7491):565.  
15 13 22. Zaal JJ, Devlin JW, Peelen LM, et al. A systematic review of risk factors for delirium in the ICU.  
16 14 *Critical care medicine* 2015;43(1):40-7.  
17 15 23. Dettmer MR, Damuth E, Zarbiv S, et al. Prognostic Factors for Long-Term Mortality in Critically Ill  
18 16 Patients Treated With Prolonged Mechanical Ventilation: A Systematic Review. *Critical care*  
19 17 *medicine* 2017;45(1):69-74.

21  
22  
23  
24  
25  
26  
27  
28  
29  
30  
31  
32  
33  
34  
35  
36  
37  
38  
39  
40  
41  
42  
43  
44  
45  
46  
47  
48  
49  
50  
51  
52  
53  
54  
55  
56  
57  
58  
59  
60

1  
2  
3  
4  
5  
6  
7  
8  
9  
10  
11  
12  
13  
14  
15  
16  
17  
18  
19  
20  
21  
22  
23  
24  
25  
26  
27  
28  
29  
30  
31  
32  
33  
34  
35  
36  
37  
38  
39  
40  
41  
42  
43  
44  
45  
46  
47

**APPENDIX 1**

PRISMA-P (Preferred Reporting Items for Systematic review and Meta-Analysis Protocols) 2015 checklist: recommended items to address in a systematic review protocol\*

| Section topic                     | Item | Checklist item                                                                                                                                                                                  | Present in review Y/N | Page and line      |
|-----------------------------------|------|-------------------------------------------------------------------------------------------------------------------------------------------------------------------------------------------------|-----------------------|--------------------|
| <b>ADMINISTRATIVE INFORMATION</b> |      |                                                                                                                                                                                                 |                       |                    |
| <b>Title:</b>                     |      |                                                                                                                                                                                                 |                       |                    |
| Identification                    | 1a   | Identify the report as a protocol of a systematic review                                                                                                                                        | Yes                   | Page 1 Line 2      |
| Update                            | 1b   | If the protocol is for an update of a previous systematic review, identify as such                                                                                                              | No                    | -                  |
| Registration                      | 2    | If registered, provide the name of the registry (such as PROSPERO) and registration number                                                                                                      | Yes                   | Page 3 Line 32-33  |
| <b>Authors:</b>                   |      |                                                                                                                                                                                                 |                       |                    |
| Contact                           | 3a   | Provide name, institutional affiliation, e-mail address of all protocol authors; provide physical mailing address of corresponding author                                                       | Yes                   | Page 1 Lines 4-6   |
| Contributions                     | 3b   | Describe contributions of protocol authors and identify the guarantor of the review                                                                                                             | Yes                   | Page 6 Lines 28-32 |
| Amendments                        | 4    | If the protocol represents an amendment of a previously completed or published protocol, identify as such and list changes; otherwise, state plan for documenting important protocol amendments | No                    | -                  |
| <b>Support:</b>                   |      |                                                                                                                                                                                                 |                       |                    |
| Sources                           | 5a   | Indicate sources of financial or other support for the review                                                                                                                                   | Yes                   | Page 6 Lines 22-24 |
| Sponsor                           | 5b   | Provide name for the review funder and/or sponsor                                                                                                                                               | Yes                   | Page 6 Lines 22-24 |
| Role of sponsor or funder         | 5c   | Describe roles of funder(s), sponsor(s), and/or institution(s), if any, in developing the protocol                                                                                              | Yes                   | Page 6 Lines 22-24 |
| <b>INTRODUCTION</b>               |      |                                                                                                                                                                                                 |                       |                    |
| Rationale                         | 6    | Describe the rationale for the review in the context of what is already known                                                                                                                   | Yes                   | Page 3 Lines 2-26  |

|                                    |     |                                                                                                                                                                                                                               |     |                                         |
|------------------------------------|-----|-------------------------------------------------------------------------------------------------------------------------------------------------------------------------------------------------------------------------------|-----|-----------------------------------------|
| Objectives                         | 7   | Provide an explicit statement of the question(s) the review will address with reference to participants, interventions, comparators, and outcomes (PICO)                                                                      | Yes | Page 3 Lines 28-29                      |
| <b>METHODS</b>                     |     |                                                                                                                                                                                                                               |     |                                         |
| Eligibility criteria               | 8   | Specify the study characteristics (such as PICO, study design, setting, time frame) and report characteristics (such as years considered, language, publication status) to be used as criteria for eligibility for the review | Yes | Page 4 Lines 21-41<br>Page 5 Lines 2-15 |
| Information sources                | 9   | Describe all intended information sources (such as electronic databases, contact with study authors, trial registers or other grey literature sources) with planned dates of coverage                                         | Yes | Page 4 Lines 2-7                        |
| Search strategy                    | 10  | Present draft of search strategy to be used for at least one electronic database, including planned limits, such that it could be repeated                                                                                    | Yes | Appendices Page 4 Lines 1-32            |
| Study records:                     |     |                                                                                                                                                                                                                               |     |                                         |
| Data management                    | 11a | Describe the mechanism(s) that will be used to manage records and data throughout the review                                                                                                                                  | Yes | Page 4 Lines 17-19                      |
| Selection process                  | 11b | State the process that will be used for selecting studies (such as two independent reviewers) through each phase of the review (that is, screening, eligibility and inclusion in meta-analysis)                               | Yes | Page 4 Lines 9-13                       |
| Data collection process            | 11c | Describe planned method of extracting data from reports (such as piloting forms, done independently, in duplicate), any processes for obtaining and confirming data from investigators                                        | Yes | Page 5 Lines 17-25                      |
| Data items                         | 12  | List and define all variables for which data will be sought (such as PICO items, funding sources), any pre-planned data assumptions and simplifications                                                                       | Yes | Page 5 Lines 19-23                      |
| Outcomes and prioritization        | 13  | List and define all outcomes for which data will be sought, including prioritization of main and additional outcomes, with rationale                                                                                          | Yes | Page 4 Line 32-36                       |
| Risk of bias in individual studies | 14  | Describe anticipated methods for assessing risk of bias of individual studies, including whether this will be done at the outcome or study level, or both; state how this information will be used in data synthesis          | Yes | Page 5 Lines 27-33                      |
| Data synthesis                     | 15a | Describe criteria under which study data will be quantitatively synthesised                                                                                                                                                   | Yes | Page 5 Lines 35-42                      |
|                                    | 15b | If data are appropriate for quantitative synthesis, describe planned summary measures, methods of handling data and methods of                                                                                                | Yes | Page 5 Lines 35-42                      |

1  
2  
3  
4  
5  
6  
7  
8  
9  
10  
11  
12  
13  
14  
15  
16  
17  
18  
19  
20  
21  
22  
23  
24  
25  
26  
27  
28  
29  
30  
31  
32  
33  
34  
35  
36  
37  
38  
39  
40  
41  
42  
43  
44  
45  
46  
47

combining data from studies, including any planned exploration of consistency (such as  $I^2$ , Kendall's  $\tau$ )

|     |                                                                                                       |     |                    |
|-----|-------------------------------------------------------------------------------------------------------|-----|--------------------|
| 15c | Describe any proposed additional analyses (such as sensitivity or subgroup analyses, meta-regression) | No  |                    |
| 15d | If quantitative synthesis is not appropriate, describe the type of summary planned                    | Yes | Page 5 Lines 35-42 |

|               |    |                                                                                                                               |    |   |
|---------------|----|-------------------------------------------------------------------------------------------------------------------------------|----|---|
| Meta-bias(es) | 16 | Specify any planned assessment of meta-bias(es) (such as publication bias across studies, selective reporting within studies) | No | - |
|---------------|----|-------------------------------------------------------------------------------------------------------------------------------|----|---|

|                                   |    |                                                                                    |     |                    |
|-----------------------------------|----|------------------------------------------------------------------------------------|-----|--------------------|
| Confidence in cumulative evidence | 17 | Describe how the strength of the body of evidence will be assessed (such as GRADE) | Yes | Page 5 Lines 35-42 |
|-----------------------------------|----|------------------------------------------------------------------------------------|-----|--------------------|

For peer review only

## APPENDIX 2

### Draft search strategy for Medline

---

|    |                                                                            |
|----|----------------------------------------------------------------------------|
| 1  | ATRIAL FIBRILLATION/                                                       |
| 2  | ATRIAL FLUTTER/                                                            |
| 3  | SUPRAVENTRICULAR TACHYCARDIA/                                              |
| 4  | "atrial fibrillation* ".ab,ti.                                             |
| 5  | "atrial flutter* ".ab,ti.                                                  |
| 6  | "supraventricular tachycardia* ".ab,ti.                                    |
| 7  | 1 or 2 or 3 or 4 or 5 or 6                                                 |
| 8  | CRITICAL CARE/                                                             |
| 9  | INTENSIVE CARE UNIT/                                                       |
| 10 | "intensive care".ab,ia,in,ti.                                              |
| 11 | "critical care".ab,ia,in,ti.                                               |
| 12 | "acute physiology".ab,ti.                                                  |
| 13 | "critical* ill* ".ab,ia,in,ti.                                             |
| 14 | (ITU or ICU or AICU).ab,ia,in,ti.                                          |
| 15 | 8 or 9 or 10 or 11 or 12 or 13 or 14                                       |
| 16 | RISK FACTORS/                                                              |
| 17 | "risk factor* ".ab,ti.                                                     |
| 18 | EPIDEMIOLOGY/                                                              |
| 19 | "epidemiolog* ".ab,ti.                                                     |
| 20 | "*etiolog* ".ab,ti.                                                        |
| 21 | "determinant* ".ab,ti.                                                     |
| 22 | "precursor* ".ab,ti.                                                       |
| 23 | "predict* ".ab,ti.                                                         |
| 24 | "trigger* ".ab,ti.                                                         |
| 25 | "marker* ".ab,ti.                                                          |
| 26 | "antecedent* ".ab,ti.                                                      |
| 27 | BIOMARKERS/                                                                |
| 28 | "new onset".ab,ti.                                                         |
| 29 | 16 or 17 or 18 or 19 or 20 or 21 or 22 or 23 or 24 or 25 or 26 or 27 or 28 |
| 30 | 7 and 15 and 29                                                            |

---



## APPENDIX 3

### NEWCASTLE - OTTAWA QUALITY ASSESSMENT SCALE

Note: A study can be awarded a maximum of one star for each numbered item within the Selection and Outcome categories. A maximum of two stars can be given for Comparability

#### Selection

1. Representativeness of the study population
  - a. Truly representative of the general adult ICU population ★
  - b. Somewhat representative of the general adult ICU population ★
  - c. Poorly representative of the general adult ICU population
  - d. No description of the derivation of the cohort
2. Demonstration that outcome of interest was not present at start of study
  - a. Exclusion of AF (current and historic) described ★
  - b. AF (current and historic) excluded but no description
3. Ascertainment of presence of risk factor
  - a. Medical record or investigation result ★
  - b. Structured interview ★
  - c. Written self-report
  - d. No description or none of the above
4. Study size
  - a.  $\geq 100$  participants in each group ★
  - b.  $< 100$  participants in each group

#### Comparability

1. Comparability of cohorts on the basis of the design or analysis
  - a. Study design controls for confounding factors ★
  - b. Study controls for confounding factors in data analysis ★

#### Outcome

1. Study design
  - a. Prospective ★
  - b. Retrospective
2. Assessment of outcome
  - a. Independent assessment of heart rhythm from primary source (e.g. monitor / ECG) ★
  - b. Non-independent assessment or heart rhythm identified from secondary source (e.g. patient records)
  - c. Other identification of heart rhythm
  - d. No description
3. Adequacy of follow up of cohorts
  - a. complete follow up - all subjects accounted for ★
  - b. subjects lost to follow up unlikely to introduce bias - small number lost -  $\geq 90\%$  follow up, or description provided of those lost) ★
  - c. follow up rate  $< 90\%$  and no description of those lost
  - d. no statement

## APPENDIX 1

PRISMA-P (Preferred Reporting Items for Systematic review and Meta-Analysis Protocols) 2015 checklist: recommended items to address in a systematic review protocol\*

| Section topic                     | Item | Checklist item                                                                                                                                                                                  | Present in review Y/N | Page and line      |
|-----------------------------------|------|-------------------------------------------------------------------------------------------------------------------------------------------------------------------------------------------------|-----------------------|--------------------|
| <b>ADMINISTRATIVE INFORMATION</b> |      |                                                                                                                                                                                                 |                       |                    |
| <b>Title:</b>                     |      |                                                                                                                                                                                                 |                       |                    |
| Identification                    | 1a   | Identify the report as a protocol of a systematic review                                                                                                                                        | Yes                   | Page 1 Line 2      |
| Update                            | 1b   | If the protocol is for an update of a previous systematic review, identify as such                                                                                                              | No                    | -                  |
| Registration                      | 2    | If registered, provide the name of the registry (such as PROSPERO) and registration number                                                                                                      | Yes                   | Page 3 Line 32-33  |
| <b>Authors:</b>                   |      |                                                                                                                                                                                                 |                       |                    |
| Contact                           | 3a   | Provide name, institutional affiliation, e-mail address of all protocol authors; provide physical mailing address of corresponding author                                                       | Yes                   | Page 1 Lines 4-6   |
| Contributions                     | 3b   | Describe contributions of protocol authors and identify the guarantor of the review                                                                                                             | Yes                   | Page 6 Lines 28-32 |
| Amendments                        | 4    | If the protocol represents an amendment of a previously completed or published protocol, identify as such and list changes; otherwise, state plan for documenting important protocol amendments | No                    | -                  |
| <b>Support:</b>                   |      |                                                                                                                                                                                                 |                       |                    |
| Sources                           | 5a   | Indicate sources of financial or other support for the review                                                                                                                                   | Yes                   | Page 6 Lines 22-24 |
| Sponsor                           | 5b   | Provide name for the review funder and/or sponsor                                                                                                                                               | Yes                   | Page 6 Lines 22-24 |
| Role of sponsor or funder         | 5c   | Describe roles of funder(s), sponsor(s), and/or institution(s), if any, in developing the protocol                                                                                              | Yes                   | Page 6 Lines 22-24 |
| <b>INTRODUCTION</b>               |      |                                                                                                                                                                                                 |                       |                    |
| Rationale                         | 6    | Describe the rationale for the review in the context of what is already known                                                                                                                   | Yes                   | Page 3 Lines 2-26  |
| Objectives                        | 7    | Provide an explicit statement of the question(s) the review will address with reference to participants, interventions, comparators, and outcomes (PICO)                                        | Yes                   | Page 3 Lines 28-29 |

1  
2  
3  
4  
5  
6  
7  
8  
9  
10  
11  
12  
13  
14  
15  
16  
17  
18  
19  
20  
21  
22  
23  
24  
25  
26  
27  
28  
29  
30  
31  
32  
33  
34  
35  
36  
37  
38  
39  
40  
41  
42  
43  
44  
45  
46

| <b>METHODS</b>                     |     |                                                                                                                                                                                                                                                  |     |                                         |
|------------------------------------|-----|--------------------------------------------------------------------------------------------------------------------------------------------------------------------------------------------------------------------------------------------------|-----|-----------------------------------------|
| Eligibility criteria               | 8   | Specify the study characteristics (such as PICO, study design, setting, time frame) and report characteristics (such as years considered, language, publication status) to be used as criteria for eligibility for the review                    | Yes | Page 4 Lines 21-41<br>Page 5 Lines 2-15 |
| Information sources                | 9   | Describe all intended information sources (such as electronic databases, contact with study authors, trial registers or other grey literature sources) with planned dates of coverage                                                            | Yes | Page 4 Lines 2-7                        |
| Search strategy                    | 10  | Present draft of search strategy to be used for at least one electronic database, including planned limits, such that it could be repeated                                                                                                       | Yes | Appendices Page 4 Lines 1-32            |
| Study records:                     |     |                                                                                                                                                                                                                                                  |     |                                         |
| Data management                    | 11a | Describe the mechanism(s) that will be used to manage records and data throughout the review                                                                                                                                                     | Yes | Page 4 Lines 17-19                      |
| Selection process                  | 11b | State the process that will be used for selecting studies (such as two independent reviewers) through each phase of the review (that is, screening, eligibility and inclusion in meta-analysis)                                                  | Yes | Page 4 Lines 9-13                       |
| Data collection process            | 11c | Describe planned method of extracting data from reports (such as piloting forms, done independently, in duplicate), any processes for obtaining and confirming data from investigators                                                           | Yes | Page 5 Lines 17-25                      |
| Data items                         | 12  | List and define all variables for which data will be sought (such as PICO items, funding sources), any pre-planned data assumptions and simplifications                                                                                          | Yes | Page 5 Lines 19-23                      |
| Outcomes and prioritization        | 13  | List and define all outcomes for which data will be sought, including prioritization of main and additional outcomes, with rationale                                                                                                             | Yes | Page 4 Line 32-36                       |
| Risk of bias in individual studies | 14  | Describe anticipated methods for assessing risk of bias of individual studies, including whether this will be done at the outcome or study level, or both; state how this information will be used in data synthesis                             | Yes | Page 5 Lines 27-33                      |
| Data synthesis                     | 15a | Describe criteria under which study data will be quantitatively synthesised                                                                                                                                                                      | Yes | Page 5 Lines 35-42                      |
|                                    | 15b | If data are appropriate for quantitative synthesis, describe planned summary measures, methods of handling data and methods of combining data from studies, including any planned exploration of consistency (such as $I^2$ , Kendall's $\tau$ ) | Yes | Page 5 Lines 35-42                      |
|                                    | 15c | Describe any proposed additional analyses (such as sensitivity or subgroup analyses, meta-regression)                                                                                                                                            | No  |                                         |

|                                   |     |                                                                                                                               |     |                    |
|-----------------------------------|-----|-------------------------------------------------------------------------------------------------------------------------------|-----|--------------------|
|                                   | 15d | If quantitative synthesis is not appropriate, describe the type of summary planned                                            | Yes | Page 5 Lines 35-42 |
| Meta-bias(es)                     | 16  | Specify any planned assessment of meta-bias(es) (such as publication bias across studies, selective reporting within studies) | No  | -                  |
| Confidence in cumulative evidence | 17  | Describe how the strength of the body of evidence will be assessed (such as GRADE)                                            | Yes | Page 5 Lines 35-42 |

For peer review only

# BMJ Open

## Risk factors for new-onset atrial fibrillation on the general adult ICU: Protocol for a systematic review

|                                 |                                                                                                                                                                                                                                                                                                                                                                                                                                         |
|---------------------------------|-----------------------------------------------------------------------------------------------------------------------------------------------------------------------------------------------------------------------------------------------------------------------------------------------------------------------------------------------------------------------------------------------------------------------------------------|
| Journal:                        | <i>BMJ Open</i>                                                                                                                                                                                                                                                                                                                                                                                                                         |
| Manuscript ID                   | bmjopen-2018-024640.R2                                                                                                                                                                                                                                                                                                                                                                                                                  |
| Article Type:                   | Protocol                                                                                                                                                                                                                                                                                                                                                                                                                                |
| Date Submitted by the Author:   | 01-Aug-2018                                                                                                                                                                                                                                                                                                                                                                                                                             |
| Complete List of Authors:       | Bedford, Jonathan; University of Oxford, Nuffield Department of Clinical Neurosciences<br>Harford, Mirae; University of Oxford, Nuffield Department of Clinical Neurosciences<br>Petricic, Tatjana; University of Oxford, Bodleian Health Care Libraries<br>Young, Duncan; University of Oxford, Nuffield Department of Clinical Neurosciences<br>Watkinson, Peter; University of Oxford, Nuffield Department of Clinical Neurosciences |
| <b>Primary Subject Heading</b>: | Intensive care                                                                                                                                                                                                                                                                                                                                                                                                                          |
| Secondary Subject Heading:      | Cardiovascular medicine, Epidemiology, Anaesthesia, Evidence based practice                                                                                                                                                                                                                                                                                                                                                             |
| Keywords:                       | INTENSIVE & CRITICAL CARE, Adult cardiology < CARDIOLOGY, EPIDEMIOLOGY                                                                                                                                                                                                                                                                                                                                                                  |
|                                 |                                                                                                                                                                                                                                                                                                                                                                                                                                         |

SCHOLARONE™  
Manuscripts

1  
2  
3 1 Risk factors for new-onset atrial fibrillation on the  
4  
5 2 general adult ICU: Protocol for a systematic review  
6

7 3 Jonathan Bedford<sup>1</sup>, Mirae Harford<sup>1</sup>, Tatjana Petrinic<sup>2</sup>, Duncan Young<sup>1</sup> and Peter Watkinson<sup>1</sup>  
8

9 4 Correspondence: Jonathan.Bedford@ndcn.ox.ac.uk

10 5 <sup>1</sup>Nuffield Department of Clinical Neurosciences, University of Oxford, Oxford, UK.

11 6 <sup>2</sup>Bodleian Health Care Libraries, University of Oxford, Oxford, UK.  
12  
13

14 8 Word count: 1864

15 9 Keywords: Atrial fibrillation, risk factors, critical illness, intensive care units, intensive care  
16  
17  
18  
19  
20  
21  
22  
23  
24  
25  
26  
27  
28  
29  
30  
31  
32  
33  
34  
35  
36  
37  
38  
39  
40  
41  
42  
43  
44  
45  
46  
47  
48  
49  
50  
51  
52  
53  
54  
55  
56  
57  
58  
59  
60

## 1 **ABSTRACT**

### 2 **Introduction**

3 Atrial fibrillation (AF) is a common arrhythmia in the critical care environment. New-onset AF is  
4 associated with increased mortality and intensive care unit (ICU) length of stay. Observational  
5 studies have identified several epidemiologic and disease severity-related factors associated with  
6 developing new-onset AF on the ICU. However, there is limited data on the modifiable risk-factors in  
7 the general adult ICU population.

8 We describe a protocol for a systematic review of modifiable and non-modifiable risk factors for  
9 new-onset AF in the general adult ICU population. The results of this review will aid the  
10 development of risk prediction tools and inform future research into AF prevention on the ICU.

### 11 **Methods and analysis**

12 MEDLINE, EMBASE and the Cochrane Library, including Cochrane Database of Systematic Reviews  
13 and the Cochrane Central Register of Controlled Trials (CENTRAL) will be searched for studies that  
14 assess the association of patient variables, investigation results, interventions and diagnoses  
15 associated with subsequent new-onset atrial fibrillation on the ICU.

16 Only studies involving adult patients admitted to non-service-specific ICUs will be included. We will  
17 extract data relating to the statistical association between reversible and non-reversible factors and  
18 AF, the quality of the studies and the generalisability of the results. This systematic review will be  
19 reported according to the Preferred Reporting Items for Systematic reviews and Meta-Analyses  
20 (PRISMA).

### 21 **Ethics and dissemination**

22 This proposed systematic review will be based on published data, and therefore ethical approval is  
23 not required. The findings of this study will be disseminated through publication in a peer reviewed  
24 journal and will be presented at conferences.

### 25 **Trial registration number**

26 CRD42017074221.

## 27 **ARTICLE SUMMARY**

### 28 **Strengths and limitations of this study**

- 29 • New-onset atrial fibrillation in intensive care is a common and important condition
- 30 • This protocol will ensure a targeted and comprehensive analysis of this poorly-understood  
31 phenomenon
- 32 • This protocol addresses issues with previous reviews in this area
- 33 • This protocol will guide an unbiased systematic review based on agreed best practice  
34 principles
- 35 • The results of this review will inform current practice and aid the development of risk  
36 prediction tools

## 1 INTRODUCTION

2 New-onset atrial fibrillation (AF) in intensive care is defined for the purposes of this protocol as AF  
3 occurring after admission to ICU in a patient with no known history of chronic or paroxysmal AF. It is  
4 the most common arrhythmia in critically ill patients<sup>1,2</sup>. It is particularly common after cardiac  
5 surgery, with a prevalence ranging from 10-65% depending on the nature of the surgery<sup>3</sup>. Data  
6 regarding new-onset AF in non-service-specific intensive care units (ICUs) is more limited.  
7 Observational data suggest new-onset AF occurs in 4.5-15% of patients in this setting<sup>4-9</sup> and up to  
8 46% of patients with septic shock<sup>10</sup>.

9 New-onset AF in critically ill patients is associated with increased mortality and length of stay<sup>1 8 11</sup>. It  
10 is unclear whether AF itself is an independent contributor to poor outcome, or rather a marker of  
11 disease severity<sup>7</sup>. However, given the detrimental effects of AF on cardiac output and filling  
12 pressures, it is feasible that the arrhythmia itself contributes to increased mortality<sup>12</sup>. Furthermore,  
13 atrial fibrillation in critically ill patients is associated with thromboembolic complications and these  
14 may contribute to poorer outcomes<sup>13</sup>.

15 Risk factors for developing AF on the ICU include patient factors such as increasing age or presence  
16 of comorbidities, and ICU interventions including renal replacement therapy, vasopressor use and  
17 the use of pulmonary artery catheters<sup>7 9 13</sup>. The risk of developing new-onset AF also increases with  
18 increasing disease severity e.g. APACHE score<sup>7</sup>. Whilst a systematic review of AF risk factors in sepsis  
19 has been undertaken<sup>14</sup>, this included studies that did not exclude patients with potential prior or  
20 paroxysmal AF<sup>15-17</sup>. A systematic review has also been undertaken in the general adult ICU  
21 population<sup>18</sup>. However, this again did not focus on true new-onset AF, and did not provide an  
22 evidence synthesis.

23 There is a paucity of data around reversible / modifiable antecedents in this context. Current  
24 practice of preventing atrial fibrillation in critically ill patients is variable and not based on robust  
25 evidence. Given the potential morbidity and mortality associated with new-onset AF on the ICU, a  
26 better understanding of modifiable and non-modifiable risk factors may improve patient care and  
27 outcomes.

## 28 OBJECTIVE

29 We will conduct a systematic review to identify studies of factors that are associated with an  
30 increased risk of new-onset atrial fibrillation in adult patients on non-service specific intensive care  
31 units.

## 32 METHODS

33 This protocol will adhere to the requirements of Preferred Reporting Items for Systematic Reviews  
34 and Meta-Analyses Protocol (PRISMA-P)<sup>19</sup> (Appendix 1). The protocol is registered, PROSPERO:  
35 CRD42017074221.

## 36 Patient and public involvement

37 We have involved the Oxford ICU patient forum. This is a cohort participants previously managed on  
38 Oxford ICUs and their relatives. They are recruited from the ICU follow-up clinic. Within this group  
39 are members who experienced atrial fibrillation during their stay. They stressed the importance of  
40 producing evidence to guide the prevention and management strategies for new-onset AF on the  
41 ICU. They felt the phenomenon was poorly understood, including investigations and management  
42 after discharge.



## 1 **Search strategy**

2 Papers will be identified by searching Medical Literature Analysis and Retrieval System Online  
3 (MEDLINE), Excerpta Medica database (EMBASE), the Cochrane Database of Systematic Reviews and  
4 the Cochrane Central Register of Controlled Trials (CENTRAL). MEDLINE and EMBASE will be accessed  
5 via the Ovid platform. We will include additional papers from other sources including the references  
6 of reviews articles or studies identified during screening. A full description of the search strategy is  
7 outlined in Appendix 2.

## 8 **Study selection**

9 Two reviewers will independently undertake initial relevance screening of titles and abstracts. The  
10 researchers will not be blinded to the journal titles or to the study authors or institutions. If there is  
11 disagreement or uncertainty regarding eligibility, the article will be included in the next stage of  
12 screening for further analysis for inclusion/exclusion. The full text will be retrieved for all articles not  
13 excluded by the initial screening. These papers will be assessed against the inclusion and exclusion  
14 criteria. Disagreements about eligibility will be resolved by discussion between the screening  
15 researchers or a third party.

## 16 **Data management**

17 We will use Covidence (Veritas Health Innovation Ltd., Melbourne, Australia) software to identify  
18 duplicate records and for relevance screening. We will use a reference manager program  
19 (EndNoteX8, Clarivate Analytics, Philadelphia, USA) to store identified citations and their electronic  
20 text.

## 21 **Inclusion criteria**

### 22 **Types of studies**

23 Quantitative studies published in peer reviewed journals assessing adults will be eligible for inclusion  
24 in this review. Studies are likely to be prospective or retrospective cohort or case-control studies.

### 25 **Study characteristics**

26 Eligible studies must include both a cohort of patients who developed new-onset atrial-fibrillation  
27 and a cohort who did not. They must include at least one risk factor that was investigated. The  
28 studies must be based in non-service-specific ICUs. These will include general medical, surgical or  
29 mixed ICUs. Studies of cohorts defined by a single disease or narrow group of diseases (e.g.  
30 myocardial infarction or sepsis) will be included. Identified studies published from January 1970 until  
31 the day of search completion will be included.

### 32 **Phenomenon of interest**

33 Studies must describe a statistical relationship between a patient-derived variable (e.g. age, blood  
34 pressure or serum potassium level) and the development of new-onset atrial fibrillation. 'Diagnosis'  
35 may be included as a variable. We will include studies that group atrial fibrillation with atrial flutter,  
36 and we will include studies investigating new-onset supraventricular arrhythmias, providing atrial  
37 fibrillation constituted at least 70% of arrhythmia episodes.

### 38 **Population**

39 Studies that sample adult patients admitted to the ICU types specified above will be considered for  
40 inclusion.

41 For the purpose of this review, an adult is defined as  $\geq 16$  years of age. There will be no other  
42 restrictions.

## 1 **Exclusion criteria**

### 2 **Types of studies**

3 Qualitative studies, case studies, editorials, letters, practice guidelines and abstract-only reports will  
4 be excluded.

### 5 **Study characteristics**

6 Studies of cohorts defined by a single procedure or narrow group of procedures (e.g.  
7 appendicectomy or hepatobiliary surgery) will be excluded. Studies based on service-specific (e.g.  
8 cardiac, cardiothoracic surgical or neurosurgical) ICUs will also be excluded. Studies published in a  
9 language other than English will be excluded.

### 10 **Phenomenon of interest**

11 Studies will be excluded if no risk factors are analysed. Studies that do not explicitly exclude or  
12 separate patients with a history of chronic or paroxysmal AF will be excluded. Studies that do not  
13 specify arrhythmia type will also be excluded.

### 14 **Population**

15 Studies of participants under 16 years old will be excluded.

## 16 **Data extraction**

17 Data will be extracted from identified full text articles and supplementary material. One researcher  
18 (JB) will be responsible for data extraction. All uncertainties regarding data extraction will be  
19 resolved by discussion amongst the study team. Extracted data will include: 1) characteristics of  
20 study setting and patient population; 2) study methodology (including ascertainment of risk factors,  
21 definition and assessment of outcome, and control of confounding variables); 3) risk factor estimates  
22 including measures quantifying risk, confidence intervals and p-values for statistical significance.  
23 Where available we will extract  $\beta$  coefficients and the units of measurement to which they refer. We  
24 will extract risk estimates identified through both univariate and multivariate analysis and record the  
25 analysis method. We will populate pre-specified data extraction tables. Where insufficient data is  
26 presented we will request additional data from the authors.

## 27 **Risk of bias assessment**

28 We will assess risk of bias using an adapted Newcastle-Ottawa Scale (NOS)<sup>20</sup>. The NOS is a scoring  
29 system designed to assess the quality of non-randomised studies in meta-analyses. Scores are  
30 attributed to each paper after assessing domains including the selection of study groups, the  
31 comparability of the groups and the ascertainment of the outcome of interest. We have  
32 incorporated adaptations from a previous systematic review of risk factors<sup>21</sup>. We have further  
33 modified this with the intention of best evaluating our phenomenon of interest. The scoring system  
34 used in this systematic review will allocate scores from zero to nine and is outlined in Appendix 3.

## 35 **Data synthesis and analysis**

36 We will extract summary comparison data as measures of risk (e.g. odds ratios or risk ratios) where  
37 possible. Where sufficient original data is presented we will calculate these measures if required. We  
38 will then conduct a semi-quantitative synthesis of results from included studies using a method  
39 previously described by Zaal, et al.<sup>22</sup> and adapted by Dettmer, et al.<sup>23</sup>. This method requires  
40 grouping of risk factors across studies. Grouped risk factors may be heterogeneous in terms of  
41 variable type (e.g. continuous or categorical) or cut-off value. Identified variables with associated p-  
42 values of  $\leq 0.05$  or 95% confidence intervals that do not cross 1 will be allocated a relative strength.  
43 This will be based on a composite of the number of articles in which an association is identified, and

1 the methodological quality of those articles as defined by our adapted NOS. Adjustment for  
 2 confounding variables contributes to a study's risk of bias score. Risk factors identified through  
 3 multivariate analysis will therefore be prioritised in the data synthesis. Criteria for strength of  
 4 evidence is outlined in table 1.

5 *Table 1 - Level of evidence for risk factors for new-onset atrial fibrillation*

| Level of evidence | Criteria                                                                                                                                                            |
|-------------------|---------------------------------------------------------------------------------------------------------------------------------------------------------------------|
| Strong evidence   | Consistent findings in $\geq 2$ high quality studies (adapted NOS score 8-9)<br>AND no conflicting studies                                                          |
| Moderate evidence | Consistent findings in 1 high quality study<br>AND $\geq 1$ acceptable quality study (adapted NOS score 6-7)<br>AND no conflicting studies                          |
| Weak evidence     | Consistent findings in $\geq 3$ low quality studies (adapted NOS score $\leq 5$ )<br>OR $\geq 2$ acceptable quality studies<br>OR 1 high quality study in isolation |

## 6 **DISCUSSION**

7 Several epidemiological and disease severity-related factors have been associated with new-onset  
 8 atrial fibrillation on the ICU in observational studies. These have not yet been investigated in the  
 9 general adult ICU population in a systematic review with an evidence synthesis. Data is also limited  
 10 regarding modifiable or reversible risk factors; available evidence is scarce regarding specific patient  
 11 vital signs, laboratory results or ICU procedures that may increase the risk of AF. Current clinical  
 12 practice is therefore variable and not evidence-based.

13 We will synthesise the weight of evidence behind identified risk factors using a semi-quantitative  
 14 analytical technique. This method will not provide a synthesis of strength of association for each risk  
 15 factor. However this information, along with study-level data such as cut-off values, will be provided  
 16 in the supplementary material.

17 The findings from this review will contribute towards an improved understanding of the modifiable  
 18 and non-modifiable antecedents of new-onset AF on the ICU. It may lead to a clinically useful risk-  
 19 prediction model and inform future research into AF prevention on the ICU. Given the high  
 20 prevalence and significant associated morbidity and mortality of new-onset AF on the ICU, optimal  
 21 prevention strategies may result in improved patient outcomes.

## 23 **DECLARATIONS**

### 24 **Abbreviations**

25 AF: atrial fibrillation; CENTRAL: The Cochrane Database of Systematic Reviews and the Cochrane  
 26 Central Register of Controlled Trials; EMBASE: Excerpta Medica database; ICU: Intensive care unit;  
 27 MEDLINE: Medical Literature Analysis and Retrieval System Online; PRISMA-P: Preferred Reporting  
 28 Items for Systematic Reviews and Meta-analyses Protocol.

### 29 **Funding**

30 This work has been funded by the National Institute for Health Research (NIHR) and by the NIHR  
 31 Biomedical Research Centre (Oxford). These funders played no role in developing the review. All  
 32 views expressed are those of the authors and not necessarily those of the Department of Health or  
 33 NIHR.

### 34 **Availability of data and materials**

1 Not applicable.

## 2 **Author contributions**

3 JB, MH, DY and PW have substantially contributed to the design of the systematic review protocol.  
4 TP has developed the search strategy. JB, DY and PW wrote this manuscript. All authors read and  
5 approved the final manuscript. The funders have not been involved in the study design or reporting.  
6 PW is guarantor of this review. The authors would like to thank the patients involved in the  
7 development of this protocol.

## 8 **Competing interests**

9 The authors declare that they have no competing interests.

## 10 **Consent for publication**

11 Not applicable.

## 12 **Ethics approval and consent to participate**

13 Not applicable.

## 15 **REFERENCES**

- 16 1. Annane D, Sebille V, Duboc D, et al. Incidence and prognosis of sustained arrhythmias in critically  
17 ill patients. *American journal of respiratory and critical care medicine* 2008;178(1):20-5.
- 18 2. Artucio H, Pereira M. Cardiac arrhythmias in critically ill patients: epidemiologic study. *Crit Care*  
19 *Med* 1990;18(12):1383-8.
- 20 3. Maisel WH, Rawn JD, Stevenson WG. Atrial fibrillation after cardiac surgery. *Annals of internal*  
21 *medicine* 2001;135(12):1061-73.
- 22 4. Kanji S, Williamson DR, Yaghchi BM, et al. Epidemiology and management of atrial fibrillation in  
23 medical and noncardiac surgical adult intensive care unit patients. *Journal of critical care*  
24 2012;27(3):326 e1-8.
- 25 5. Bender JS. Supraventricular tachyarrhythmias in the surgical intensive care unit: an under-  
26 recognized event. *The American surgeon* 1996;62(1):73-5.
- 27 6. Knotzer H, Mayr A, Ulmer H, et al. Tachyarrhythmias in a surgical intensive care unit: a case-  
28 controlled epidemiologic study. *Intensive care medicine* 2000;26(7):908-14.
- 29 7. Carrera P, Thongprayoon C, Cheungpasitporn W, et al. Epidemiology and outcome of new-onset  
30 atrial fibrillation in the medical intensive care unit. *Journal of critical care* 2016;36:102-06.
- 31 8. Chen AY, Sokol SS, Kress JP, et al. New-onset atrial fibrillation is an independent predictor of  
32 mortality in medical intensive care unit patients. *The Annals of pharmacotherapy*  
33 2015;49(5):523-7.
- 34 9. Makrygiannis SS, Margariti A, Rizikou D, et al. Incidence and predictors of new-onset atrial  
35 fibrillation in noncardiac intensive care unit patients. *Journal of critical care* 2014;29(4):697  
36 e1-5.
- 37 10. Meierhenrich R, Steinhilber E, Eggermann C, et al. Incidence and prognostic impact of new-onset  
38 atrial fibrillation in patients with septic shock: a prospective observational study. *Critical care*  
39 *(London, England)* 2010;14(3):R108.
- 40 11. Salman S, Bajwa A, Gajic O, et al. Paroxysmal atrial fibrillation in critically ill patients with sepsis.  
41 *Journal of intensive care medicine* 2008;23(3):178-83.
- 42 12. Pozzoli M, Cioffi G, Traversi E, et al. Predictors of primary atrial fibrillation and concomitant  
43 clinical and hemodynamic changes in patients with chronic heart failure: a prospective study  
44 in 344 patients with baseline sinus rhythm. *Journal of the American College of Cardiology*  
45 1998;32(1):197-204.

- 1  
2  
3 1 13. Walkey AJ, Wiener RS, Ghobrial JM, et al. Incident stroke and mortality associated with new-onset atrial fibrillation in patients hospitalized with severe sepsis. *Jama* 2011;306(20):2248-54.
- 4 2  
5 3  
6 4 14. Kuipers S, Klein Klouwenberg PM, Cremer OL. Incidence, risk factors and outcomes of new-onset atrial fibrillation in patients with sepsis: a systematic review. *Crit Care* 2014;18(6):688.
- 7 5  
8 6 15. Arora S, Lang I, Nayyar V, et al. Atrial fibrillation in a tertiary care multidisciplinary intensive care unit - Incidence and risk factors. *Anaesthesia and intensive care* 2007;35(5):707-13.
- 9 7  
10 8 16. Seguin P, Signouret T, Laviolle B, et al. Incidence and risk factors of atrial fibrillation in a surgical intensive care unit. *Critical care medicine* 2004;32(3):722-6.
- 11 9  
12 10 17. Seguin P, Laviolle B, Maurice A, et al. Atrial fibrillation in trauma patients requiring intensive care. *Intensive care medicine* 2006;32(3):398-404.
- 13 11  
14 12 18. Yoshida T, Fujii T, Uchino S, et al. Epidemiology, prevention, and treatment of new-onset atrial fibrillation in critically ill: a systematic review. *Journal of intensive care* 2015;3(1):19.
- 15 13  
16 14 19. Shamseer L, Moher D, Clarke M, et al. Preferred reporting items for systematic review and meta-analysis protocols (PRISMA-P) 2015: elaboration and explanation. *BMJ (Clinical research ed)* 2015;350:g7647.
- 17 15  
18 16  
19 17 20. Wells G, Shea B, O'connell D, et al. The Newcastle-Ottawa Scale (NOS) for assessing the quality of nonrandomised studies in meta-analyses. Ottawa Hospital Research Institute, 2014: oxford.asp, 2015.
- 20 18  
21 19  
22 20 21. Duckitt K, Harrington D. Risk factors for pre-eclampsia at antenatal booking: systematic review of controlled studies. *BMJ (Clinical research ed)* 2005;330(7491):565.
- 23 21  
24 22 22. Zaal IJ, Devlin JW, Peelen LM, et al. A systematic review of risk factors for delirium in the ICU. *Critical care medicine* 2015;43(1):40-7.
- 25 22  
26 23  
27 24 23. Dettmer MR, Damuth E, Zarbiv S, et al. Prognostic Factors for Long-Term Mortality in Critically Ill Patients Treated With Prolonged Mechanical Ventilation: A Systematic Review. *Critical care medicine* 2017;45(1):69-74.
- 28 25  
29 26  
30  
31 27

1  
2  
3  
4  
5  
6  
7  
8  
9  
10  
11  
12  
13  
14  
15  
16  
17  
18  
19  
20  
21  
22  
23  
24  
25  
26  
27  
28  
29  
30  
31  
32  
33  
34  
35  
36  
37  
38  
39  
40  
41  
42  
43  
44  
45  
46  
47

**APPENDIX 1**

PRISMA-P (Preferred Reporting Items for Systematic review and Meta-Analysis Protocols) 2015 checklist: recommended items to address in a systematic review protocol\*

| Section topic                     | Item | Checklist item                                                                                                                                                                                  | Present in review Y/N | Page and line      |
|-----------------------------------|------|-------------------------------------------------------------------------------------------------------------------------------------------------------------------------------------------------|-----------------------|--------------------|
| <b>ADMINISTRATIVE INFORMATION</b> |      |                                                                                                                                                                                                 |                       |                    |
| <b>Title:</b>                     |      |                                                                                                                                                                                                 |                       |                    |
| Identification                    | 1a   | Identify the report as a protocol of a systematic review                                                                                                                                        | Yes                   | Page 1 Line 2      |
| Update                            | 1b   | If the protocol is for an update of a previous systematic review, identify as such                                                                                                              | No                    | -                  |
| Registration                      | 2    | If registered, provide the name of the registry (such as PROSPERO) and registration number                                                                                                      | Yes                   | Page 3 Line 32-33  |
| <b>Authors:</b>                   |      |                                                                                                                                                                                                 |                       |                    |
| Contact                           | 3a   | Provide name, institutional affiliation, e-mail address of all protocol authors; provide physical mailing address of corresponding author                                                       | Yes                   | Page 1 Lines 4-6   |
| Contributions                     | 3b   | Describe contributions of protocol authors and identify the guarantor of the review                                                                                                             | Yes                   | Page 6 Lines 28-32 |
| Amendments                        | 4    | If the protocol represents an amendment of a previously completed or published protocol, identify as such and list changes; otherwise, state plan for documenting important protocol amendments | No                    | -                  |
| <b>Support:</b>                   |      |                                                                                                                                                                                                 |                       |                    |
| Sources                           | 5a   | Indicate sources of financial or other support for the review                                                                                                                                   | Yes                   | Page 6 Lines 22-24 |
| Sponsor                           | 5b   | Provide name for the review funder and/or sponsor                                                                                                                                               | Yes                   | Page 6 Lines 22-24 |
| Role of sponsor or funder         | 5c   | Describe roles of funder(s), sponsor(s), and/or institution(s), if any, in developing the protocol                                                                                              | Yes                   | Page 6 Lines 22-24 |
| <b>INTRODUCTION</b>               |      |                                                                                                                                                                                                 |                       |                    |
| Rationale                         | 6    | Describe the rationale for the review in the context of what is already known                                                                                                                   | Yes                   | Page 3 Lines 2-26  |

|                                    |     |                                                                                                                                                                                                                               |     |                                         |
|------------------------------------|-----|-------------------------------------------------------------------------------------------------------------------------------------------------------------------------------------------------------------------------------|-----|-----------------------------------------|
| Objectives                         | 7   | Provide an explicit statement of the question(s) the review will address with reference to participants, interventions, comparators, and outcomes (PICO)                                                                      | Yes | Page 3 Lines 28-29                      |
| <b>METHODS</b>                     |     |                                                                                                                                                                                                                               |     |                                         |
| Eligibility criteria               | 8   | Specify the study characteristics (such as PICO, study design, setting, time frame) and report characteristics (such as years considered, language, publication status) to be used as criteria for eligibility for the review | Yes | Page 4 Lines 21-41<br>Page 5 Lines 2-15 |
| Information sources                | 9   | Describe all intended information sources (such as electronic databases, contact with study authors, trial registers or other grey literature sources) with planned dates of coverage                                         | Yes | Page 4 Lines 2-7                        |
| Search strategy                    | 10  | Present draft of search strategy to be used for at least one electronic database, including planned limits, such that it could be repeated                                                                                    | Yes | Appendices Page 4 Lines 1-32            |
| Study records:                     |     |                                                                                                                                                                                                                               |     |                                         |
| Data management                    | 11a | Describe the mechanism(s) that will be used to manage records and data throughout the review                                                                                                                                  | Yes | Page 4 Lines 17-19                      |
| Selection process                  | 11b | State the process that will be used for selecting studies (such as two independent reviewers) through each phase of the review (that is, screening, eligibility and inclusion in meta-analysis)                               | Yes | Page 4 Lines 9-13                       |
| Data collection process            | 11c | Describe planned method of extracting data from reports (such as piloting forms, done independently, in duplicate), any processes for obtaining and confirming data from investigators                                        | Yes | Page 5 Lines 17-25                      |
| Data items                         | 12  | List and define all variables for which data will be sought (such as PICO items, funding sources), any pre-planned data assumptions and simplifications                                                                       | Yes | Page 5 Lines 19-23                      |
| Outcomes and prioritization        | 13  | List and define all outcomes for which data will be sought, including prioritization of main and additional outcomes, with rationale                                                                                          | Yes | Page 4 Line 32-36                       |
| Risk of bias in individual studies | 14  | Describe anticipated methods for assessing risk of bias of individual studies, including whether this will be done at the outcome or study level, or both; state how this information will be used in data synthesis          | Yes | Page 5 Lines 27-33                      |
| Data synthesis                     | 15a | Describe criteria under which study data will be quantitatively synthesised                                                                                                                                                   | Yes | Page 5 Lines 35-42                      |
|                                    | 15b | If data are appropriate for quantitative synthesis, describe planned summary measures, methods of handling data and methods of                                                                                                | Yes | Page 5 Lines 35-42                      |

1  
2  
3  
4  
5  
6  
7  
8  
9  
10  
11  
12  
13  
14  
15  
16  
17  
18  
19  
20  
21  
22  
23  
24  
25  
26  
27  
28  
29  
30  
31  
32  
33  
34  
35  
36  
37  
38  
39  
40  
41  
42  
43  
44  
45  
46  
47

combining data from studies, including any planned exploration of consistency (such as  $I^2$ , Kendall's  $\tau$ )

|     |                                                                                                       |     |                    |
|-----|-------------------------------------------------------------------------------------------------------|-----|--------------------|
| 15c | Describe any proposed additional analyses (such as sensitivity or subgroup analyses, meta-regression) | No  |                    |
| 15d | If quantitative synthesis is not appropriate, describe the type of summary planned                    | Yes | Page 5 Lines 35-42 |

|               |    |                                                                                                                               |    |   |
|---------------|----|-------------------------------------------------------------------------------------------------------------------------------|----|---|
| Meta-bias(es) | 16 | Specify any planned assessment of meta-bias(es) (such as publication bias across studies, selective reporting within studies) | No | - |
|---------------|----|-------------------------------------------------------------------------------------------------------------------------------|----|---|

|                                   |    |                                                                                    |     |                    |
|-----------------------------------|----|------------------------------------------------------------------------------------|-----|--------------------|
| Confidence in cumulative evidence | 17 | Describe how the strength of the body of evidence will be assessed (such as GRADE) | Yes | Page 5 Lines 35-42 |
|-----------------------------------|----|------------------------------------------------------------------------------------|-----|--------------------|

For peer review only



## APPENDIX 2

### Draft search strategy for Medline

---

|    |                                                                            |
|----|----------------------------------------------------------------------------|
| 1  | ATRIAL FIBRILLATION/                                                       |
| 2  | ATRIAL FLUTTER/                                                            |
| 3  | SUPRAVENTRICULAR TACHYCARDIA/                                              |
| 4  | "atrial fibrillation* ".ab,ti.                                             |
| 5  | "atrial flutter* ".ab,ti.                                                  |
| 6  | "supraventricular tachycardia* ".ab,ti.                                    |
| 7  | 1 or 2 or 3 or 4 or 5 or 6                                                 |
| 8  | CRITICAL CARE/                                                             |
| 9  | INTENSIVE CARE UNIT/                                                       |
| 10 | "intensive care".ab,ia,in,ti.                                              |
| 11 | "critical care".ab,ia,in,ti.                                               |
| 12 | "acute physiology".ab,ti.                                                  |
| 13 | "critical* ill* ".ab,ia,in,ti.                                             |
| 14 | (ITU or ICU or AICU).ab,ia,in,ti.                                          |
| 15 | 8 or 9 or 10 or 11 or 12 or 13 or 14                                       |
| 16 | RISK FACTORS/                                                              |
| 17 | "risk factor* ".ab,ti.                                                     |
| 18 | EPIDEMIOLOGY/                                                              |
| 19 | "epidemiolog* ".ab,ti.                                                     |
| 20 | "*etiolog* ".ab,ti.                                                        |
| 21 | "determinant* ".ab,ti.                                                     |
| 22 | "precursor* ".ab,ti.                                                       |
| 23 | "predict* ".ab,ti.                                                         |
| 24 | "trigger* ".ab,ti.                                                         |
| 25 | "marker* ".ab,ti.                                                          |
| 26 | "antecedent* ".ab,ti.                                                      |
| 27 | BIOMARKERS/                                                                |
| 28 | "new onset".ab,ti.                                                         |
| 29 | 16 or 17 or 18 or 19 or 20 or 21 or 22 or 23 or 24 or 25 or 26 or 27 or 28 |
| 30 | 7 and 15 and 29                                                            |

---

## APPENDIX 3

### NEWCASTLE - OTTAWA QUALITY ASSESSMENT SCALE

Note: A study can be awarded a maximum of one star for each numbered item within the Selection and Outcome categories. A maximum of two stars can be given for Comparability

#### Selection

1. Representativeness of the study population
  - a. Truly representative of the general adult ICU population ★
  - b. Somewhat representative of the general adult ICU population ★
  - c. Poorly representative of the general adult ICU population
  - d. No description of the derivation of the cohort
2. Demonstration that outcome of interest was not present at start of study
  - a. Exclusion of AF (current and historic) described ★
  - b. AF (current and historic) excluded but no description
3. Ascertainment of presence of risk factor
  - a. Medical record or investigation result ★
  - b. Structured interview ★
  - c. Written self-report
  - d. No description or none of the above
4. Study size
  - a.  $\geq 100$  participants in each group ★
  - b.  $< 100$  participants in each group

#### Comparability

1. Comparability of cohorts on the basis of the design or analysis
  - a. Study design controls for confounding factors ★
  - b. Study controls for confounding factors in data analysis ★

#### Outcome

1. Study design
  - a. Prospective ★
  - b. Retrospective
2. Assessment of outcome
  - a. Independent assessment of heart rhythm from primary source (e.g. monitor / ECG) ★
  - b. Non-independent assessment or heart rhythm identified from secondary source (e.g. patient records)
  - c. Other identification of heart rhythm
  - d. No description
3. Adequacy of follow up of cohorts
  - a. complete follow up - all subjects accounted for ★
  - b. subjects lost to follow up unlikely to introduce bias - small number lost -  $\geq 90\%$  follow up, or description provided of those lost) ★
  - c. follow up rate  $< 90\%$  and no description of those lost
  - d. no statement

## APPENDIX 1

PRISMA-P (Preferred Reporting Items for Systematic review and Meta-Analysis Protocols) 2015 checklist: recommended items to address in a systematic review protocol\*

| Section topic                     | Item | Checklist item                                                                                                                                                                                  | Present in review Y/N | Page and line      |
|-----------------------------------|------|-------------------------------------------------------------------------------------------------------------------------------------------------------------------------------------------------|-----------------------|--------------------|
| <b>ADMINISTRATIVE INFORMATION</b> |      |                                                                                                                                                                                                 |                       |                    |
| <b>Title:</b>                     |      |                                                                                                                                                                                                 |                       |                    |
| Identification                    | 1a   | Identify the report as a protocol of a systematic review                                                                                                                                        | Yes                   | Page 1 Line 2      |
| Update                            | 1b   | If the protocol is for an update of a previous systematic review, identify as such                                                                                                              | No                    | -                  |
| Registration                      | 2    | If registered, provide the name of the registry (such as PROSPERO) and registration number                                                                                                      | Yes                   | Page 3 Line 32-33  |
| <b>Authors:</b>                   |      |                                                                                                                                                                                                 |                       |                    |
| Contact                           | 3a   | Provide name, institutional affiliation, e-mail address of all protocol authors; provide physical mailing address of corresponding author                                                       | Yes                   | Page 1 Lines 4-6   |
| Contributions                     | 3b   | Describe contributions of protocol authors and identify the guarantor of the review                                                                                                             | Yes                   | Page 7 Lines 3-7   |
| Amendments                        | 4    | If the protocol represents an amendment of a previously completed or published protocol, identify as such and list changes; otherwise, state plan for documenting important protocol amendments | No                    | -                  |
| <b>Support:</b>                   |      |                                                                                                                                                                                                 |                       |                    |
| Sources                           | 5a   | Indicate sources of financial or other support for the review                                                                                                                                   | Yes                   | Page 6 Lines 30-32 |
| Sponsor                           | 5b   | Provide name for the review funder and/or sponsor                                                                                                                                               | Yes                   | Page 6 Lines 30-32 |
| Role of sponsor or funder         | 5c   | Describe roles of funder(s), sponsor(s), and/or institution(s), if any, in developing the protocol                                                                                              | Yes                   | Page 6 Lines 30-32 |
| <b>INTRODUCTION</b>               |      |                                                                                                                                                                                                 |                       |                    |
| Rationale                         | 6    | Describe the rationale for the review in the context of what is already known                                                                                                                   | Yes                   | Page 3 Lines 2-26  |
| Objectives                        | 7    | Provide an explicit statement of the question(s) the review will address with reference to participants, interventions, comparators, and outcomes (PICO)                                        | Yes                   | Page 3 Lines 28-29 |

1  
2  
3  
4  
5  
6  
7  
8  
9  
10  
11  
12  
13  
14  
15  
16  
17  
18  
19  
20  
21  
22  
23  
24  
25  
26  
27  
28  
29  
30  
31  
32  
33  
34  
35  
36  
37  
38  
39  
40  
41  
42  
43  
44  
45  
46

| <b>METHODS</b>                     |     |                                                                                                                                                                                                                                                  |     |                                         |
|------------------------------------|-----|--------------------------------------------------------------------------------------------------------------------------------------------------------------------------------------------------------------------------------------------------|-----|-----------------------------------------|
| Eligibility criteria               | 8   | Specify the study characteristics (such as PICO, study design, setting, time frame) and report characteristics (such as years considered, language, publication status) to be used as criteria for eligibility for the review                    | Yes | Page 4 Lines 21-41<br>Page 5 Lines 2-15 |
| Information sources                | 9   | Describe all intended information sources (such as electronic databases, contact with study authors, trial registers or other grey literature sources) with planned dates of coverage                                                            | Yes | Page 4 Lines 2-7                        |
| Search strategy                    | 10  | Present draft of search strategy to be used for at least one electronic database, including planned limits, such that it could be repeated                                                                                                       | Yes | Appendices Page 4 Lines 1-32            |
| Study records:                     |     |                                                                                                                                                                                                                                                  |     |                                         |
| Data management                    | 11a | Describe the mechanism(s) that will be used to manage records and data throughout the review                                                                                                                                                     | Yes | Page 4 Lines 17-19                      |
| Selection process                  | 11b | State the process that will be used for selecting studies (such as two independent reviewers) through each phase of the review (that is, screening, eligibility and inclusion in meta-analysis)                                                  | Yes | Page 4 Lines 9-15                       |
| Data collection process            | 11c | Describe planned method of extracting data from reports (such as piloting forms, done independently, in duplicate), any processes for obtaining and confirming data from investigators                                                           | Yes | Page 5 Lines 17-26                      |
| Data items                         | 12  | List and define all variables for which data will be sought (such as PICO items, funding sources), any pre-planned data assumptions and simplifications                                                                                          | Yes | Page 5 Lines 19-26                      |
| Outcomes and prioritization        | 13  | List and define all outcomes for which data will be sought, including prioritization of main and additional outcomes, with rationale                                                                                                             | Yes | Page 4 Line 32-36                       |
| Risk of bias in individual studies | 14  | Describe anticipated methods for assessing risk of bias of individual studies, including whether this will be done at the outcome or study level, or both; state how this information will be used in data synthesis                             | Yes | Page 5 Lines 28-34                      |
| Data synthesis                     | 15a | Describe criteria under which study data will be quantitatively synthesised                                                                                                                                                                      | Yes | Page 5 Lines 36-43                      |
|                                    | 15b | If data are appropriate for quantitative synthesis, describe planned summary measures, methods of handling data and methods of combining data from studies, including any planned exploration of consistency (such as $I^2$ , Kendall's $\tau$ ) | Yes | Page 5 Lines 36-43<br>Page 6 lines 1-4  |
|                                    | 15c | Describe any proposed additional analyses (such as sensitivity or subgroup analyses, meta-regression)                                                                                                                                            | No  |                                         |

|                                   |     |                                                                                                                               |     |                                        |
|-----------------------------------|-----|-------------------------------------------------------------------------------------------------------------------------------|-----|----------------------------------------|
|                                   | 15d | If quantitative synthesis is not appropriate, describe the type of summary planned                                            | Yes | Page 5 Lines 36-43<br>Page 6 lines 1-4 |
| Meta-bias(es)                     | 16  | Specify any planned assessment of meta-bias(es) (such as publication bias across studies, selective reporting within studies) | No  | -                                      |
| Confidence in cumulative evidence | 17  | Describe how the strength of the body of evidence will be assessed (such as GRADE)                                            | Yes | Page 5 Lines 36-43<br>Page 6 lines 1-4 |

For peer review only
