# Supplementary material for: Risk factors for new-onset atrial fibrillation on the general adult ICU: protocol for a systematic review
Source: PubMed Central journal article supplement — BMJ Open. 2018 Sep 4;8(9):e024640. doi: 10.1136/bmjopen-2018-024640 (PMC6129085; doi:10.1136/bmjopen-2018-024640), 2018-09-04
Supplement: bmjopen-2018-024640supp001.pdf [file bmjopen-2018-024640supp001.pdf]

## APPENDIX 1

PRISMA-P (Preferred Reporting Items for Systematic review and Meta-Analysis Protocols) 2015 checklist: recommended items to address in a systematic review protocol\*

| Section topic              | Item | Checklist item                                                                                                                                                                                  |                       |                    |
|----------------------------|------|-------------------------------------------------------------------------------------------------------------------------------------------------------------------------------------------------|-----------------------|--------------------|
| ADMINISTRATIVE INFORMATION |      |                                                                                                                                                                                                 | Present in review Y/N | Page and line      |
| <b>Title:</b>              |      |                                                                                                                                                                                                 |                       |                    |
| Identification             | 1a   | Identify the report as a protocol of a systematic review                                                                                                                                        | Yes                   | Page 1 Line 2      |
| Update                     | 1b   | If the protocol is for an update of a previous systematic review, identify as such                                                                                                              | No                    | -                  |
| Registration               | 2    | If registered, provide the name of the registry (such as PROSPERO) and registration number                                                                                                      | Yes                   | Page 3 Line 32-33  |
| <b>Authors:</b>            |      |                                                                                                                                                                                                 |                       |                    |
| Contact                    | 3a   | Provide name, institutional affiliation, e-mail address of all protocol authors; provide physical mailing address of corresponding author                                                       | Yes                   | Page 1 Lines 4-6   |
| Contributions              | 3b   | Describe contributions of protocol authors and identify the guarantor of the review                                                                                                             | Yes                   | Page 6 Lines 28-32 |
| Amendments                 | 4    | If the protocol represents an amendment of a previously completed or published protocol, identify as such and list changes; otherwise, state plan for documenting important protocol amendments | No                    | -                  |
| <b>Support:</b>            |      |                                                                                                                                                                                                 |                       |                    |
| Sources                    | 5a   | Indicate sources of financial or other support for the review                                                                                                                                   | Yes                   | Page 6 Lines 22-24 |
| Sponsor                    | 5b   | Provide name for the review funder and/or sponsor                                                                                                                                               | Yes                   | Page 6 Lines 22-24 |
| Role of sponsor or funder  | 5c   | Describe roles of funder(s), sponsor(s), and/or institution(s), if any, in developing the protocol                                                                                              | Yes                   | Page 6 Lines 22-24 |
| INTRODUCTION               |      |                                                                                                                                                                                                 |                       |                    |
| Rationale                  | 6    | Describe the rationale for the review in the context of what is already known                                                                                                                   | Yes                   | Page 3 Lines 2-26  |

|                                    |     |                                                                                                                                                                                                                               |     |                                         |
|------------------------------------|-----|-------------------------------------------------------------------------------------------------------------------------------------------------------------------------------------------------------------------------------|-----|-----------------------------------------|
| Objectives                         | 7   | Provide an explicit statement of the question(s) the review will address with reference to participants, interventions, comparators, and outcomes (PICO)                                                                      | Yes | Page 3 Lines 28-29                      |
| <b>METHODS</b>                     |     |                                                                                                                                                                                                                               |     |                                         |
| Eligibility criteria               | 8   | Specify the study characteristics (such as PICO, study design, setting, time frame) and report characteristics (such as years considered, language, publication status) to be used as criteria for eligibility for the review | Yes | Page 4 Lines 21-41<br>Page 5 Lines 2-15 |
| Information sources                | 9   | Describe all intended information sources (such as electronic databases, contact with study authors, trial registers or other grey literature sources) with planned dates of coverage                                         | Yes | Page 4 Lines 2-7                        |
| Search strategy                    | 10  | Present draft of search strategy to be used for at least one electronic database, including planned limits, such that it could be repeated                                                                                    | Yes | Appendices Page 4 Lines 1-32            |
| Study records:                     |     |                                                                                                                                                                                                                               |     |                                         |
| Data management                    | 11a | Describe the mechanism(s) that will be used to manage records and data throughout the review                                                                                                                                  | Yes | Page 4 Lines 17-19                      |
| Selection process                  | 11b | State the process that will be used for selecting studies (such as two independent reviewers) through each phase of the review (that is, screening, eligibility and inclusion in meta-analysis)                               | Yes | Page 4 Lines 9-13                       |
| Data collection process            | 11c | Describe planned method of extracting data from reports (such as piloting forms, done independently, in duplicate), any processes for obtaining and confirming data from investigators                                        | Yes | Page 5 Lines 17-25                      |
| Data items                         | 12  | List and define all variables for which data will be sought (such as PICO items, funding sources), any pre-planned data assumptions and simplifications                                                                       | Yes | Page 5 Lines 19-23                      |
| Outcomes and prioritization        | 13  | List and define all outcomes for which data will be sought, including prioritization of main and additional outcomes, with rationale                                                                                          | Yes | Page 4 Line 32-36                       |
| Risk of bias in individual studies | 14  | Describe anticipated methods for assessing risk of bias of individual studies, including whether this will be done at the outcome or study level, or both; state how this information will be used in data synthesis          | Yes | Page 5 Lines 27-33                      |
| Data synthesis                     | 15a | Describe criteria under which study data will be quantitatively synthesised                                                                                                                                                   | Yes | Page 5 Lines 35-42                      |
|                                    | 15b | If data are appropriate for quantitative synthesis, describe planned summary measures, methods of handling data and methods of                                                                                                | Yes | Page 5 Lines 35-42                      |

|                                   |     |                                                                                                                               |     |                    |
|-----------------------------------|-----|-------------------------------------------------------------------------------------------------------------------------------|-----|--------------------|
|                                   |     | combining data from studies, including any planned exploration of consistency (such as $I^2$ , Kendall's $\tau$ )             |     |                    |
|                                   | 15c | Describe any proposed additional analyses (such as sensitivity or subgroup analyses, meta-regression)                         | No  |                    |
|                                   | 15d | If quantitative synthesis is not appropriate, describe the type of summary planned                                            | Yes | Page 5 Lines 35-42 |
| Meta-bias(es)                     | 16  | Specify any planned assessment of meta-bias(es) (such as publication bias across studies, selective reporting within studies) | No  | -                  |
| Confidence in cumulative evidence | 17  | Describe how the strength of the body of evidence will be assessed (such as GRADE)                                            | Yes | Page 5 Lines 35-42 |

## APPENDIX 2

### Draft search strategy for Medline

---

|    |                                                                            |
|----|----------------------------------------------------------------------------|
| 1  | ATRIAL FIBRILLATION/                                                       |
| 2  | ATRIAL FLUTTER/                                                            |
| 3  | SUPRAVENTRICULAR TACHYCARDIA/                                              |
| 4  | "atrial fibrillation* ".ab,ti.                                             |
| 5  | "atrial flutter* ".ab,ti.                                                  |
| 6  | "supraventricular tachycardia* ".ab,ti.                                    |
| 7  | 1 or 2 or 3 or 4 or 5 or 6                                                 |
| 8  | CRITICAL CARE/                                                             |
| 9  | INTENSIVE CARE UNIT/                                                       |
| 10 | "intensive care".ab,ia,in,ti.                                              |
| 11 | "critical care".ab,ia,in,ti.                                               |
| 12 | "acute physiology".ab,ti.                                                  |
| 13 | "critical* ill* ".ab,ia,in,ti.                                             |
| 14 | (ITU or ICU or AICU).ab,ia,in,ti.                                          |
| 15 | 8 or 9 or 10 or 11 or 12 or 13 or 14                                       |
| 16 | RISK FACTORS/                                                              |
| 17 | "risk factor* ".ab,ti.                                                     |
| 18 | EPIDEMIOLOGY/                                                              |
| 19 | "epidemiolog* ".ab,ti.                                                     |
| 20 | "*etiolog* ".ab,ti.                                                        |
| 21 | "determinant* ".ab,ti.                                                     |
| 22 | "precursor* ".ab,ti.                                                       |
| 23 | "predict* ".ab,ti.                                                         |
| 24 | "trigger* ".ab,ti.                                                         |
| 25 | "marker* ".ab,ti.                                                          |
| 26 | "antecedent* ".ab,ti.                                                      |
| 27 | BIOMARKERS/                                                                |
| 28 | "new onset".ab,ti.                                                         |
| 29 | 16 or 17 or 18 or 19 or 20 or 21 or 22 or 23 or 24 or 25 or 26 or 27 or 28 |
| 30 | 7 and 15 and 29                                                            |

---

## APPENDIX 3

### NEWCASTLE - OTTAWA QUALITY ASSESSMENT SCALE

Note: A study can be awarded a maximum of one star for each numbered item within the Selection and Outcome categories. A maximum of two stars can be given for Comparability

#### Selection

1. Representativeness of the study population
  - a. Truly representative of the general adult ICU population ★
  - b. Somewhat representative of the general adult ICU population ★
  - c. Poorly representative of the general adult ICU population
  - d. No description of the derivation of the cohort
2. Demonstration that outcome of interest was not present at start of study
  - a. Exclusion of AF (current and historic) described ★
  - b. AF (current and historic) excluded but no description
3. Ascertainment of presence of risk factor
  - a. Medical record or investigation result ★
  - b. Structured interview ★
  - c. Written self-report
  - d. No description or none of the above
4. Study size
  - a.  $\geq 100$  participants in each group ★
  - b.  $< 100$  participants in each group

#### Comparability

1. Comparability of cohorts on the basis of the design or analysis
  - a. Study design controls for confounding factors ★
  - b. Study controls for confounding factors in data analysis ★

#### Outcome

1. Study design
  - a. Prospective ★
  - b. Retrospective
2. Assessment of outcome
  - a. Independent assessment of heart rhythm from primary source (e.g. monitor / ECG) ★
  - b. Non-independent assessment or heart rhythm identified from secondary source (e.g. patient records)
  - c. Other identification of heart rhythm
  - d. No description
3. Adequacy of follow up of cohorts
  - a. complete follow up - all subjects accounted for ★
  - b. subjects lost to follow up unlikely to introduce bias - small number lost -  $\geq 90\%$  follow up, or description provided of those lost) ★
  - c. follow up rate  $< 90\%$  and no description of those lost
  - d. no statement
